# Supplementary material for: ZnCl2 loaded TiO2 nanomaterial: an efficient green catalyst to one-pot solvent-free synthesis of propargylamines
Source: Royal Society of Chemistry journal article supplement (doi:10.1039/c9ra06693d), 2019-01-01
Supplement: c9ra06693d1.pdf [file c9ra06693d1.pdf]

## Electronic Supplementary Information

### **ZnCl<sub>2</sub> loaded TiO<sub>2</sub> nanomaterial: an efficient green catalyst to one-pot solvent-free synthesis of propargylamines**

Digambar B. Bankar,<sup>a, b</sup> Ranjit R. Hawaldar,<sup>a</sup> Sudhir S. Arbuj,<sup>a</sup> Mansur H. Moulavi,<sup>a</sup> Santosh T. Shinde,<sup>d</sup> Shrikant P. Takle,<sup>a</sup> Manish D. Shinde,<sup>a</sup> Dinesh P. Amalnerkar<sup>c</sup> and Kaluram G. Kanade<sup>\*a, c</sup>

<sup>a</sup> *Centre for Materials for Electronics Technology (C-MET), Panchwati, Off Pashan Road, Pune-411008, India*

<sup>b</sup> *P.G. Department of Chemistry, R. B. Narayanrao Borawake College, Shrirampur, Ahmednagar-413709, India*

<sup>c</sup> *P.G. and Research Centre, Yashavantrao Chavan Institute of Science, Satara- 415001, India*

<sup>d</sup> *P.G. Department of Chemistry, Annasaheb Awate College, Manchar, Pune-410503, India*

*\* Corresponding author e-mail : kgkanade@yahoo.co.in*

## Contents

- I. Fig. S1 XRD of recovered catalyst (Page No. 3)
- II. Characterization data of as-synthesized propargylamine derivatives (Page No. 4 to 9)
- III.  $^1\text{H}$  NMR,  $^{13}\text{C}$  NMR and HRMS spectra of propargylamine derivatives (Page No. 10 to 46)

I. Fig. S1 XRD of recovered catalyst

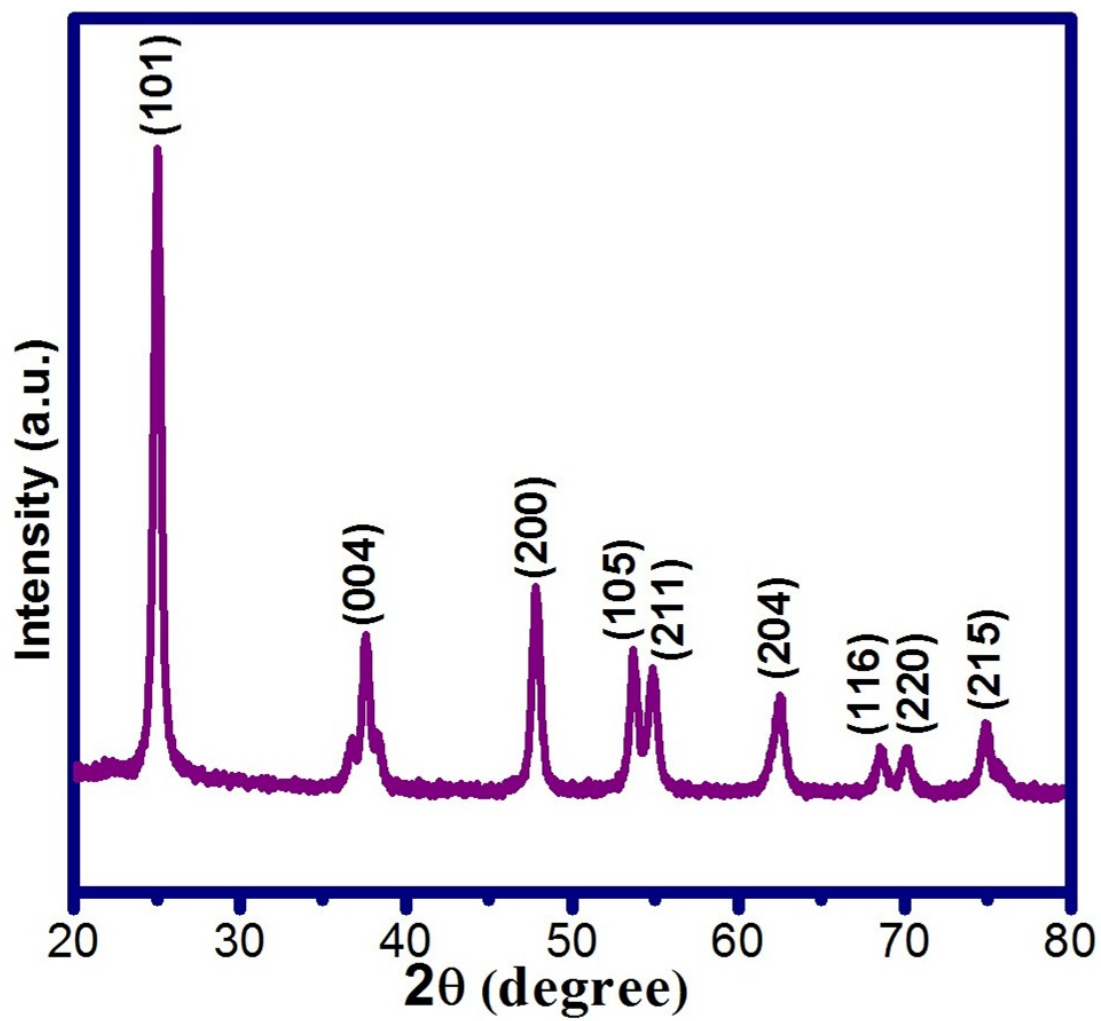

Fig. S1 XRD of recovered catalyst

## II. Spectral data of as-synthesized propargylamine derivatives (Table 3, entries 1 to 12)

### *3-(1-morpholino-3-phenylprop-2-ynyl)phenol* (Table 3, entry 1)

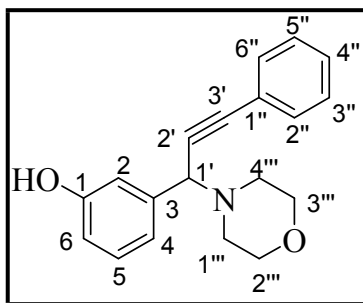

$^1\text{H}$  NMR (500 MHz,  $\text{DMSO-}d_6$ ):  $\delta$  = 2.47-2.56 (m, 4H, H-1''' & H-4'''), 3.60-3.63 (m, 4H, H-2''' & H-3'''), 4.86 (s, 1H, H-1'), 6.70-6.72 (m, 1H, H-2), 6.99-7.04 (m, 2H, H-4 and H-6), 7.16-7.20 (m, 1H, H-5), 7.40-7.54 (m, 5H, H-2'' to H-6''), 9.46 (s, 1H, OH);

$^{13}\text{C}$  NMR (125 MHz,  $\text{CDCl}_3$ ):  $\delta$  = 49.85 (C-1''' & C-4'''), 61.91 (C-1'), 67.01 (C-2''' & C-3'''), 84.80 (C-2'), 88.52 (C-3'), 115.12 (C-2), 115.73 (C-6), 120.73 (C-4), 122.78 (C-5), 128.36 (C-3'' & C-5''), 128.39 (C-1''), 129.49 (C-4''), 131.82 (C-2'' & C-6''), 139.18 (C-3), 156.11 (C-1);

HRMS (ESI)  $m/z$  calcd. for  $\text{C}_{19}\text{H}_{20}\text{NO}_2$ ,  $[\text{M}+\text{H}]$ : 294.1494, found 294.1494.

### *1-(1-(4-methoxyphenyl)-3-phenylprop-2-ynyl)pyrrolidine* (Table 3, entry 2)

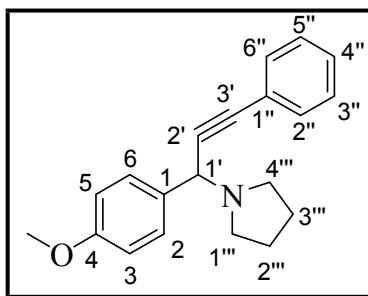

$^1\text{H}$  NMR (500 MHz,  $\text{CDCl}_3$ ):  $\delta$  = 1.79-1.85 (m, 4H, H-2''' & H-3'''), 2.71-2.72 (m, 4H, H-1''' & H-4'''), 3.83 (s, 3H,  $\text{OCH}_3$ ), 4.87 (s, 1H, H-1'), 6.90-6.93 (m, 2H, H-3 & H-5), 7.32-7.35 (m, 3H, ArH), 7.50-7.55 (m, 4H, ArH);

$^{13}\text{C}$  NMR (125 MHz,  $\text{CDCl}_3$ ):  $\delta$  = 23.48 (C-2''' & C-3'''), 50.25 (C-1''' & C-4'''), 55.30 (C-1'), 58.51 ( $\text{OCH}_3$ ), 86.74 (C-2'), 86.93 (C-3'), 113.61 (C-3 & C-5), 123.25 (C-1), 128.09 (C-1''), 128.28 (C-2 & C-6), 129.45 (C-3'' & C-5''), 131.60 (C-4''), 131.79 (C-2'' & C-6''), 159.08 (C-4);

HRMS (ESI)  $m/z$  calcd. for  $\text{C}_{20}\text{H}_{22}\text{NO}$ ,  $[\text{M}+\text{H}]$ : 292.1701, found 292.1699.

**4-(1-(4-methoxyphenyl)-3-phenylprop-2-ynyl)morpholine (Table 3, entry 3)**

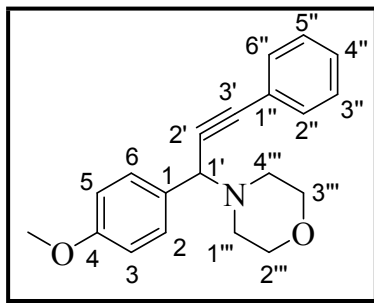

$^1\text{H}$  NMR (500 MHz,  $\text{CDCl}_3$ ):  $\delta$  = 2.57-2.64 (m, 4H, H-1''' & H-4'''), 3.68-3.73 (m, 4H, H-2''' & H-3'''), 3.80 (s, 3H,  $\text{OCH}_3$ ), 4.72 (s, 1H, H-1'), 6.87-6.90 (m, 2H, H-3 & H-5), 7.30-7.34 (m, 3H, ArH), 7.48-7.54 (m, 4H, ArH);

$^{13}\text{C}$  NMR (125 MHz,  $\text{CDCl}_3$ ):  $\delta$  = 49.82 (C-1''' & C-4'''), 55.31 (C-1'), 61.46 ( $\text{OCH}_3$ ), 67.18 (C-2''' & C-3'''), 85.39 (C-2'), 88.27 (C-3'), 113.79 (C-3 & C-5), 123.04 (C-1), 128.24 (C-1''), 128.33 (C-2 & C-6), 129.76 (C-3'' & C-5''), 129.88 (C-4''), 132.03 (C-2'' & C-6''), 159.23 (C-4);

HRMS (ESI)  $m/z$  calcd. for  $\text{C}_{20}\text{H}_{22}\text{NO}_2$ ,  $[\text{M}+\text{H}]$ : 308.1650, found 308.1651.

**2-(3-phenyl-1-(pyrrolidin-1-yl)prop-2-ynyl)phenol (Table 3, entry 4)**

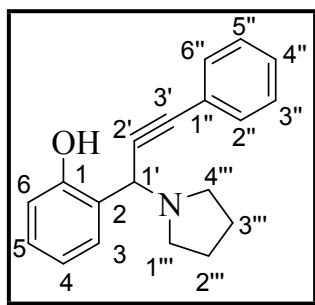

$^1\text{H}$  NMR (500 MHz,  $\text{DMSO}-d_6$ ):  $\delta$  = 1.74-1.79 (m, 4H, H-2''' & H-3'''), 2.63-2.75 (m, 4H, H-1''' & H-4'''), 5.32 (s, 1H, H-1'), 6.78-6.85 (m, 2H, H-4 & H-6), 7.15-7.18 (m, 1H, H-3), 7.39-7.47 (m, 4H, ArH), 7.50-7.52 (m, 2H, H-2'' & H-6'');

$^{13}\text{C}$  NMR (125 MHz,  $\text{CDCl}_3$ ):  $\delta$  = 23.68 (C-2''' & C-3'''), 49.61 (C-1''' & C-4'''), 55.10 (C-1'), 85.67 (C-2'), 87.51 (C-3'), 116.18 (C-6), 119.26 (C-4), 122.50 (C-2), 123.71 (C-3), 128.58 (C-5), 129.18 (C-1''), 129.42 (C-4''), 132.04 (C-2'' & C-6''), 156.74 (C-1);

HRMS (ESI)  $m/z$  calcd. for  $\text{C}_{19}\text{H}_{20}\text{NO}$ ,  $[\text{M}+\text{H}]$ : 278.1544, found 278.1540.

**2-(1-morpholino-3-phenylprop-2-ynyl)phenol (Table 3, entry 5)**

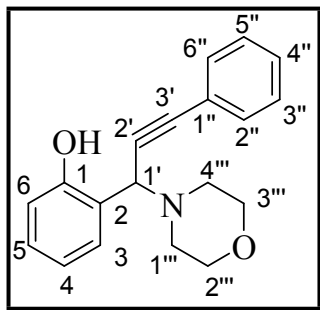

$^1\text{H}$  NMR (500 MHz,  $\text{DMSO-}d_6$ ):  $\delta$  = 2.56-2.66 (m, 4H, H-1''' & H-4'''), 3.63-3.66 (m, 4H, H-2''' & H-3'''), 5.22 (s, 1H, H-1'), 6.82-6.88 (m, 2H, H-4 & H-6), 7.17-7.21 (m, 1H, H-3), 7.40-7.57 (m, 6H, ArH), 10.31 (s, 1H, OH);

$^{13}\text{C}$  NMR (125 MHz,  $\text{CDCl}_3$ ):  $\delta$  = 49.00 (C-1''' & C-4'''), 60.74 (C-1'), 66.90 (C-2''' & C-3'''), 81.59 (C-2'), 90.45 (C-3'), 116.53 (C-6), 119.48 (C-4), 120.57 (C-2), 122.28 (C-3), 128.67 (C-5), 128.80 (C-1'', C-3'' & C-5''), 129.80 (C-4''), 132.14 (C-2'' & C-6''), 157.03 (C-1);

HRMS (ESI)  $m/z$  calcd. for  $\text{C}_{19}\text{H}_{20}\text{NO}_2$ ,  $[\text{M}+\text{H}]$ : 294.1494, found 294.1492.

**4-(1, 3-diphenylprop-2-ynyl)morpholine (Table 3, entry 6)**

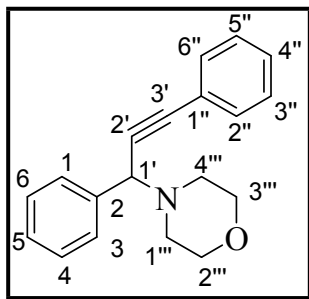

$^1\text{H}$  NMR (500 MHz,  $\text{CDCl}_3$ ):  $\delta$  = 2.59-2.63 (m, 4H, H-1''' & H-4'''), 3.69-3.76 (m, 4H, H-2''' & H-3'''), 4.78 (s, 1H, H-1'), 7.28-7.38 (m, 6H, ArH), 7.49-7.53 (m, 2H, ArH), 7.62-7.63 (m, 2H, H-2'' & H-6'');

$^{13}\text{C}$  NMR (125 MHz,  $\text{CDCl}_3$ ):  $\delta$  = 49.90 (C-1''' & C-4'''), 62.06 (C-1'), 67.19 (C-2''' & C-3'''), 85.07 (C-2'), 88.53 (C-3'), 123.00 (C-1), 127.94 (C-3), 128.30 (C-4 & C-6), 128.35 (C-5), 128.63 (C-3'' & C-5''), 129.94 (C-1''), 131.85 (C-2'', C-4'' & C-6''), 137.82 (C-2);

HRMS (ESI)  $m/z$  calcd. for  $\text{C}_{19}\text{H}_{20}\text{NO}$ ,  $[\text{M}+\text{H}]$ : 278.1544, found 278.1545.

**1-(1, 3-diphenylprop-2-ynyl)pyrrolidine (Table 3, entry 7)**

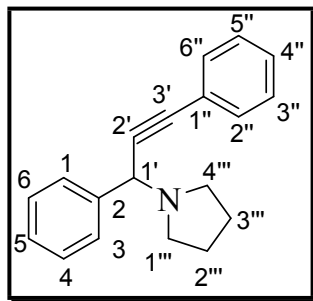

$^1\text{H}$  NMR (500 MHz,  $\text{CDCl}_3$ ):  $\delta$  = 1.82-1.85 (m, 4H, H-2''' & H-3'''), 2.72-2.75 (m, 4H, H-1''' & H-4'''), 4.93 (s, 1H, H-1'), 7.31-7.40 (m, 6H, ArH), 7.51-7.53 (m, 2H, ArH), 7.63-7.65 (m, 2H, H-2'' & H-6'');

$^{13}\text{C}$  NMR (125 MHz,  $\text{CDCl}_3$ ):  $\delta$  = 23.51 (C-2''' & C-3'''), 50.28 (C-1''' & C-4'''), 59.13 (C-1'), 86.66 (C-2'), 86.95 (C-3'), 123.24 (C-1), 127.62 (2  $\times$  ArC), 128.29 (5  $\times$  ArC), 131.81 (C-2'', C-4'' & C-6'');

HRMS (ESI)  $m/z$  calcd. for  $\text{C}_{19}\text{H}_{20}\text{N}$ ,  $[\text{M}+\text{H}]$ : 262.1595, found 262.1595.

**1-(1-(4-fluorophenyl)-3-phenylprop-2-ynyl)pyrrolidine (Table 3, entry 8)**

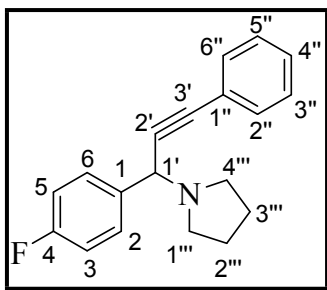

$^1\text{H}$  NMR (500 MHz,  $\text{CDCl}_3$ ):  $\delta$  = 1.83-1.86 (m, 4H, H-2''' & H-3'''), 2.72-2.78 (m, 4H, H-1''' & H-4'''), 4.98(s, 1H, H-1'), 7.04-7.10 (m, 2H, H-3 & H-5), 7.34-7.36 (m, 3H, ArH), 7.51-7.53 (m, 2H, ArH), 7.60-7.63 (m, 2H, H-2'' & H-6'');

$^{13}\text{C}$  NMR (125 MHz,  $\text{CDCl}_3$ ):  $\delta$  = 23.50 (C-2''' & C-3'''), 50.07 (C-1''' & C-4'''), 58.22 (C-1'), 85.96 (C-2'), 87.38 (C-3'), 115.09 (C-3 & C-5), 122.92 (1  $\times$  ArC), 128.31 (3  $\times$  ArC), 129.95 (2  $\times$  ArC), 131.81 (3  $\times$  ArC), 163.30 (C-4);

HRMS (ESI)  $m/z$  calcd. for  $\text{C}_{19}\text{H}_{19}\text{FN}$ ,  $[\text{M}+\text{H}]$ : 280.1501, found 280.1502.

**1-(1-(2-chlorophenyl)-3-phenylprop-2-ynyl)pyrrolidine (Table 3, entry 9)**

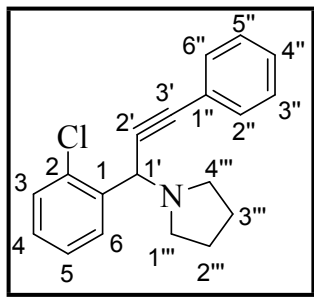

$^1\text{H}$  NMR (500 MHz,  $\text{CDCl}_3$ ):  $\delta$  = 1.76-1.81 (m, 4H, H-2''' & H-3'''), 2.67-2.77 (m, 4H, H-1''' & H-4'''), 5.29 (s, 1H, H-1'), 7.23-7.27 (m, 2H, ArH), 7.29-7.32 (m, 3H, ArH), 7.36-7.38 (m, 1H, ArH), 7.44-7.48 (m, 2H, H-2'' & H-6''), 7.77-7.79 (m, 1H, H-4'');

$^{13}\text{C}$  NMR (125 MHz,  $\text{CDCl}_3$ ):  $\delta$  = 22.43 (C-2''' & C-3'''), 49.34 (C-1''' & C-4'''), 54.54 (C-1'), 85.40 (C-2'), 85.44 (C-3'), 122.02 (C-5), 125.62 (C-3), 127.12 (C-1), 127.22 (C-4 & C-6), 127.77 (C-5''), 128.60 (C-3''), 129.08 (C-1''), 130.74 (C-2'' & C-6''), 132.77 (C-4''), 136.15 (C-2);

HRMS (ESI)  $m/z$  calcd. for  $\text{C}_{19}\text{H}_{19}\text{ClN}$ ,  $[\text{M}+\text{H}]$ : 296.1206, found 296.1210.

**4-(1-(2-chlorophenyl)-3-phenylprop-2-ynyl)morpholine (Table 3, entry 10)**

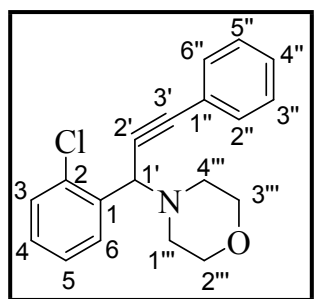

$^1\text{H}$  NMR (500 MHz,  $\text{CDCl}_3$ ):  $\delta$  = 2.66-2.67 (m, 4H, H-1''' & H-4'''), 3.66-3.74 (m, 4H, H-2''' & H-3'''), 5.12 (s, 1H, H-1'), 7.23-7.29 (m, 2H, ArH), 7.31-7.33 (m, 3H, ArH), 7.39-7.41 (m, 1H, ArH), 7.47-7.50 (m, 2H, H-2'' & H-6''), 7.73-7.75 (m, 1H, H-4'');

$^{13}\text{C}$  NMR (125 MHz,  $\text{CDCl}_3$ ):  $\delta$  = 49.84 (C-1''' & C-4'''), 58.94 (C-1'), 67.13 (C-2''' & C-3'''), 84.69 (C-2'), 88.36 (C-3'), 122.81 (C-5), 126.37 (C-3), 128.36 (C-4 & C-6), 128.39 (C-1), 129.16 (C-5''), 129.93 (C-3''), 130.56 (C-1''), 131.83 (C-2'' & C-6''), 134.67 (C-4''), 135.55 (C-2);

HRMS (ESI)  $m/z$  calcd. for  $\text{C}_{19}\text{H}_{19}\text{ClNO}$ ,  $[\text{M}+\text{H}]$ : 312.1155, found 312.1149.



**4-(1-(4-chlorophenyl)-3-phenylprop-2-ynyl)morpholine (Table 3, entry 11)**

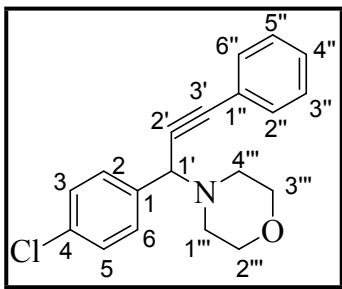

$^1\text{H NMR}$  (500 MHz,  $\text{CDCl}_3$ ):  $\delta$  = 2.60-2.61 (m, 4H, H-1''' & H-4'''), 3.68-3.76 (m, 4H, H-2''' & H-3'''), 4.75 (s, 1H, H-1'), 7.31-7.34 (m, 5H, ArH), 7.49-7.51 (m, 2H, ArH), 7.56-7.59 (m, 2H, H-2'' & H-6'');

$^{13}\text{C NMR}$  (125 MHz,  $\text{CDCl}_3$ ):  $\delta$  = 49.81 (C-1''' & C-4'''), 61.39 (C-1'), 67.13 (C-2''' & C-3'''), 84.37 (C-2'), 88.94 (C-3'), 122.73 (C-1), 128.41 (C-2, C-3, C-5 & C-6), 128.45 (C-1''), 129.92 (C-3'' & C-5''), 131.84 (C-2'' & C-6''), 133.60 (C-4''), 136.47 (C-4);

HRMS (ESI)  $m/z$  calcd. for  $\text{C}_{19}\text{H}_{19}\text{ClNO}$ ,  $[\text{M}+\text{H}]$ : 312.1155, found 312.1153.

**4-(1-(4-bromophenyl)-3-phenylprop-2-ynyl)morpholine (Table 3, entry 12)**

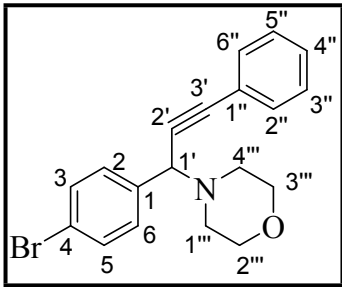

$^1\text{H NMR}$  (500 MHz,  $\text{CDCl}_3$ ):  $\delta$  = 2.60-2.61 (m, 4H, H-1''' & H-4'''), 3.69-3.76 (m, 4H, H-2''' & H-3'''), 4.73 (s, 1H, H-1'), 7.32-7.35 (m, 3H, ArH), 7.47-7.53 (m, 6H, ArH);

$^{13}\text{C NMR}$  (125 MHz,  $\text{CDCl}_3$ ):  $\delta$  = 49.81 (C-1''' & C-4'''), 61.44 (C-1'), 67.14 (C-2''' & C-3'''), 84.28 (C-2'), 88.97 (C-3'), 122.71 (C-1), 128.40 (C-3 & C-5), 128.54 (C-1''), 130.29 (C-2 & C-6), 131.38 (C-3'', C-4'' & C-5''), 131.84 (C-2'' & C-6''), 137.01 (C-4);

HRMS (ESI)  $m/z$  calcd. for  $\text{C}_{19}\text{H}_{19}\text{BrNO}$ ,  $[\text{M}+\text{H}]$ : 356.0650, 358.0629, found 356.0653, 358.0634.

**III.  $^1\text{NMR}$ ,  $^{13}\text{C}$  NMR and HRMS spectra of propargylamine derivatives  
(Table 3, Entries 1 to 12)**

# <sup>1</sup>H NMR (Table 3, Entry 1)

DB-127

Proton\_spin DMSO {E:\AWATE COLLEGE} Snehal 17

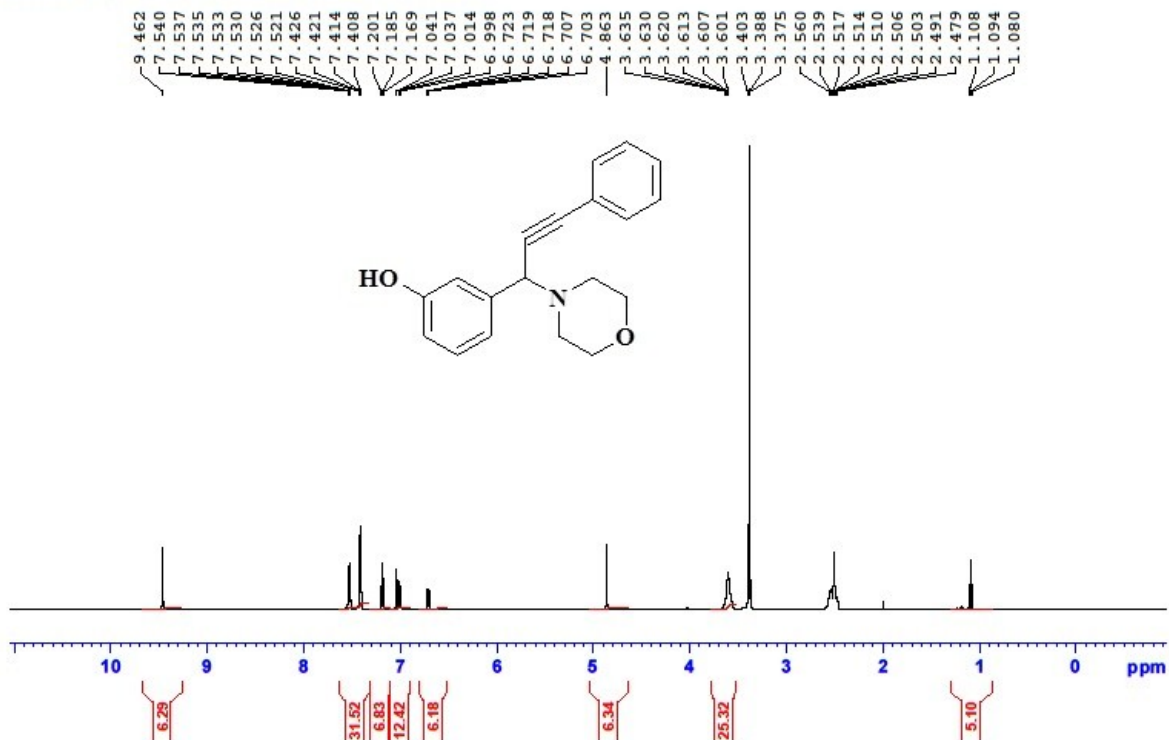

### <sup>13</sup>C NMR (Table 3, Entry 1)

DB-127

C13CPD CDC13 {E:\AWATE COLLEGE} Snehal 9

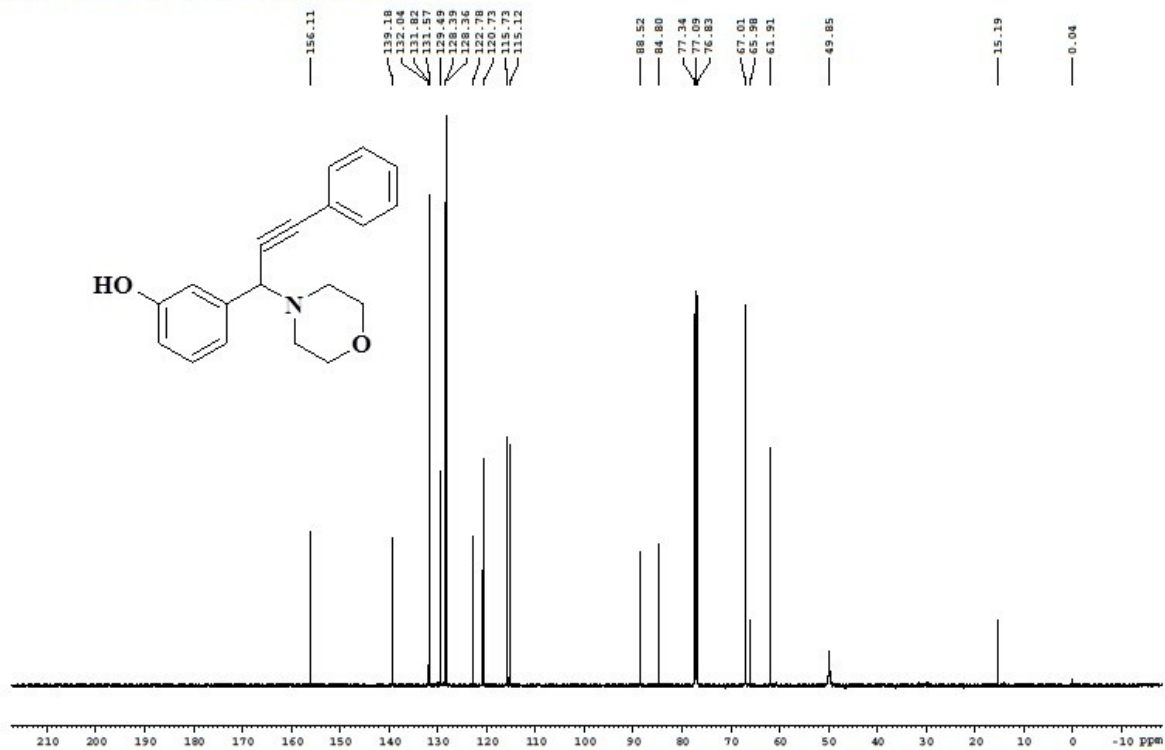

### HRMS (Table 3, Entry 1)

---

**Savitribai Phule Pune University - Central Instrumentation Facility**

---

|                      |                                                                                                                   |                  |                       |               |
|----------------------|-------------------------------------------------------------------------------------------------------------------|------------------|-----------------------|---------------|
| <b>Analysis Info</b> |                                                                                                                   | Acquisition Date | 10/7/2017 11:44:23 AM |               |
| Analysis Name        | D:\Data\2017\SEPTEMBER\SPPU AFFILIATED\ANNASAHEB AWATE COLLEGE MANCHAR\K G KANADE\BANKAR D B\DB-127_BE4_01_4439.d |                  |                       |               |
| Method               | dlo-ms600mz_10min.m                                                                                               | Operator         | CIF                   |               |
| Sample Name          | DB-127                                                                                                            | Instrument       | impact HD             | 1819696.00184 |
| Comment              |                                                                                                                   |                  |                       |               |

---

|                              |         |                      |          |                  |           |
|------------------------------|---------|----------------------|----------|------------------|-----------|
| <b>Acquisition Parameter</b> |         |                      |          |                  |           |
| Source Type                  | ESI     | Ion Polarity         | Positive | Set Nebulizer    | 0.3 Bar   |
| Focus                        | Active  | Set Capillary        | 3500 V   | Set Dry Heater   | 200 °C    |
| Scan Begin                   | 50 m/z  | Set End Plate Offset | -500 V   | Set Dry Gas      | 4.0 l/min |
| Scan End                     | 600 m/z | Set Charging Voltage | 2000 V   | Set Divert Valve | Waste     |
|                              |         | Set Corona           | 0 nA     | Set APCI Heater  | 0 °C      |

---

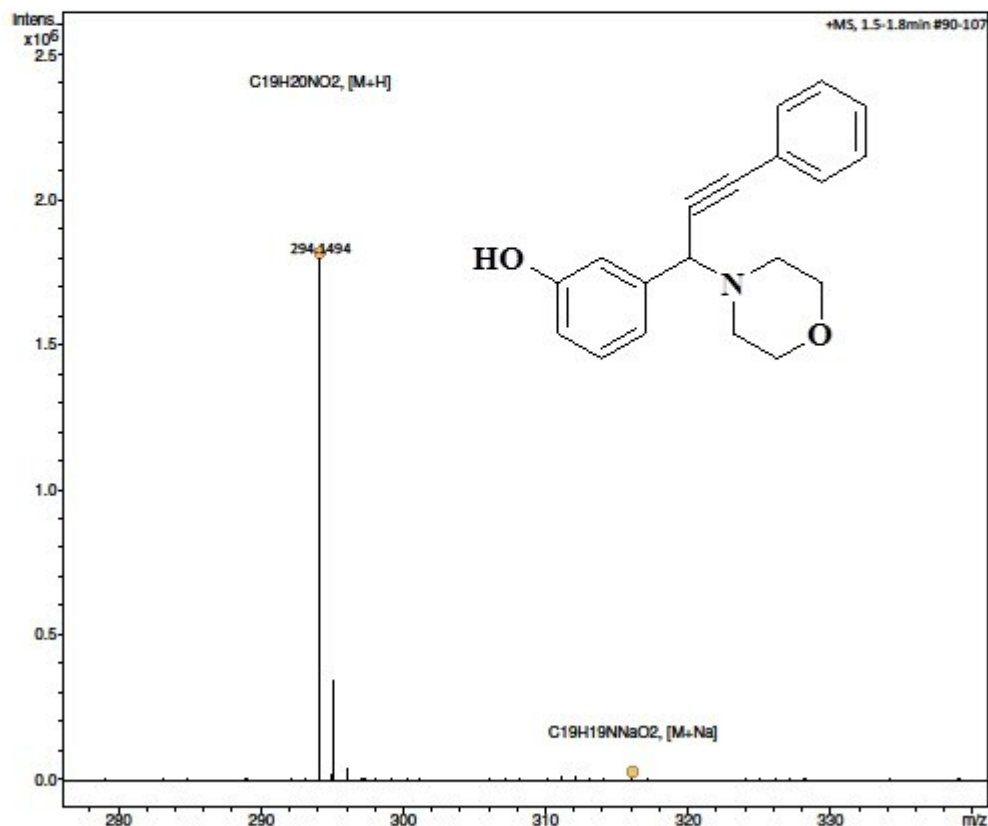

| Meas. m/z | # | Ion Formula                                       | m/z      | err [ppm] | mSigma | # | mSigma | Score | rdb  | e <sup>-</sup> | Conf | N-Rule | Adduct |
|-----------|---|---------------------------------------------------|----------|-----------|--------|---|--------|-------|------|----------------|------|--------|--------|
| 294.1494  | 1 | C <sub>19</sub> H <sub>20</sub> NO <sub>2</sub>   | 294.1489 | -1.9      | 12.7   | 1 | 100.00 | 10.5  | even |                |      | ok     | M+H    |
| 316.1310  | 1 | C <sub>19</sub> H <sub>19</sub> NNaO <sub>2</sub> | 316.1308 | -0.7      | 9.3    | 1 | 100.00 | 10.5  | even |                |      | ok     | M+Na   |

DB-127\_BE4\_01\_4439.d

Bruker Compass DataAnalysis 4.2

printed: 10/7/2017 12:01:21 PM

by: CIF

Page 1 of 1

# <sup>1</sup>H NMR (Table 3, Entry 2)

DB-123

PROTON\_DepttChem CDCl<sub>3</sub> {D:\AWATE COLLEGE} Snehal 9

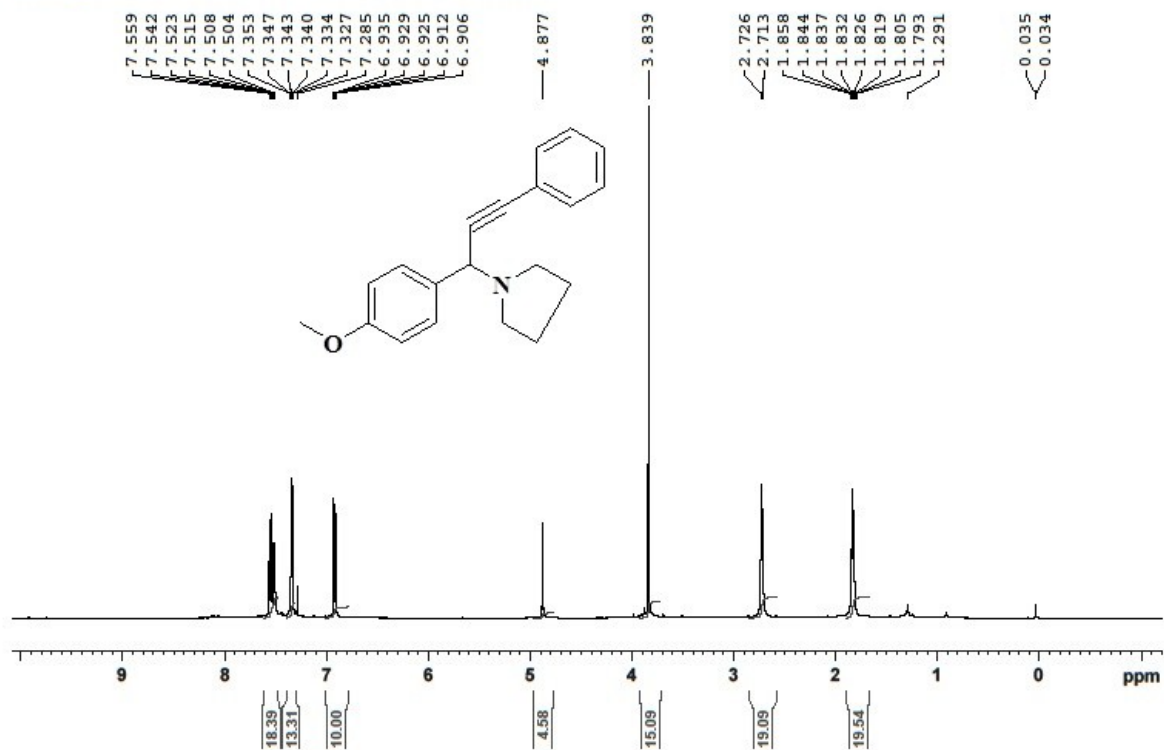

<sup>13</sup>C NMR (Table 3, Entry 2)

DB-123  
C13CPD CDCl3 {D:\AWATE COLLEGE} Snehal 9

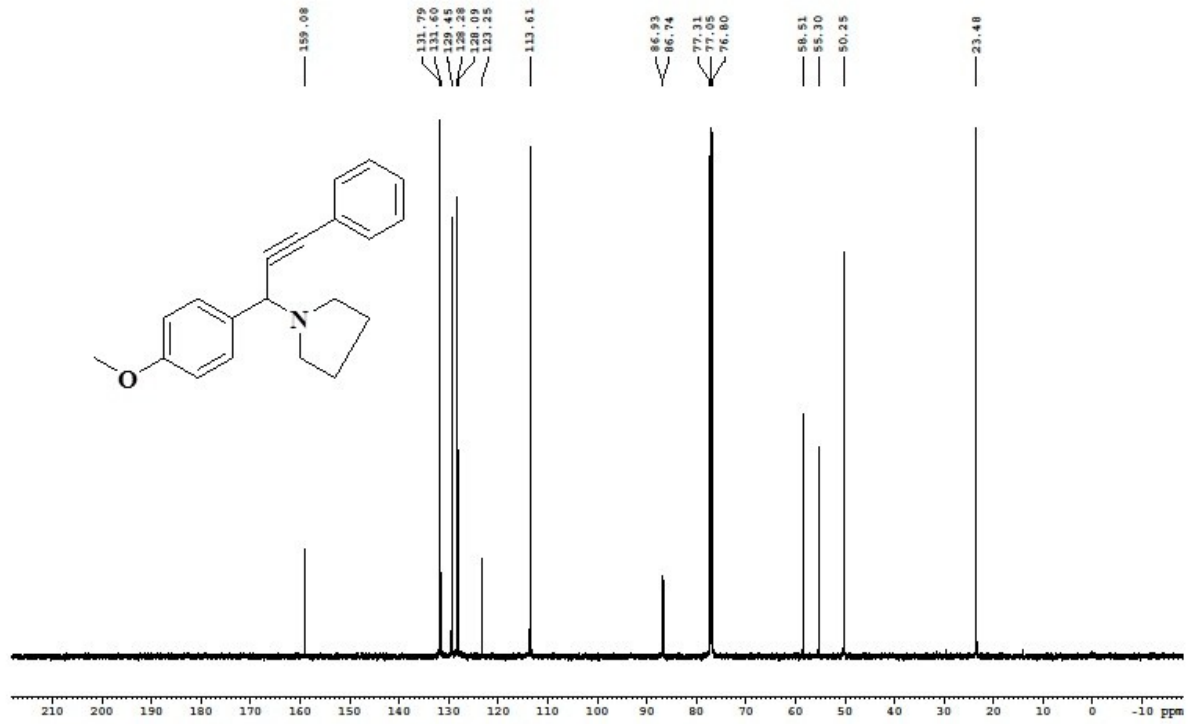

HRMS (Table 3, Entry 2)

Savitribai Phule Pune University - Central Instrumentation Facility

**Analysis Info**  
 Analysis Name D:\Data\2017\JUNE\SPPU AFFILIATED\A AWATE COLLEGE, MANCHAR\KG KANADE\DB BANKAR\DB -123\_BD8\_01\_4165.d  
 Method dlo-ms600mz\_10min.m  
 Sample Name DB -123  
 Comment  
 Acquisition Date 8/10/2017 12:13:56 PM  
 Operator CIF  
 Instrument impact HD 1819696.00184

**Acquisition Parameter**

|             |         |                      |          |                  |           |
|-------------|---------|----------------------|----------|------------------|-----------|
| Source Type | ESI     | Ion Polarity         | Positive | Set Nebulizer    | 0.3 Bar   |
| Focus       | Active  | Set Capillary        | 3500 V   | Set Dry Heater   | 200 °C    |
| Scan Begin  | 50 m/z  | Set End Plate Offset | -500 V   | Set Dry Gas      | 4.0 l/min |
| Scan End    | 600 m/z | Set Charging Voltage | 2000 V   | Set Divert Valve | Waste     |
|             |         | Set Corona           | 0 nA     | Set APCI Heater  | 0 °C      |

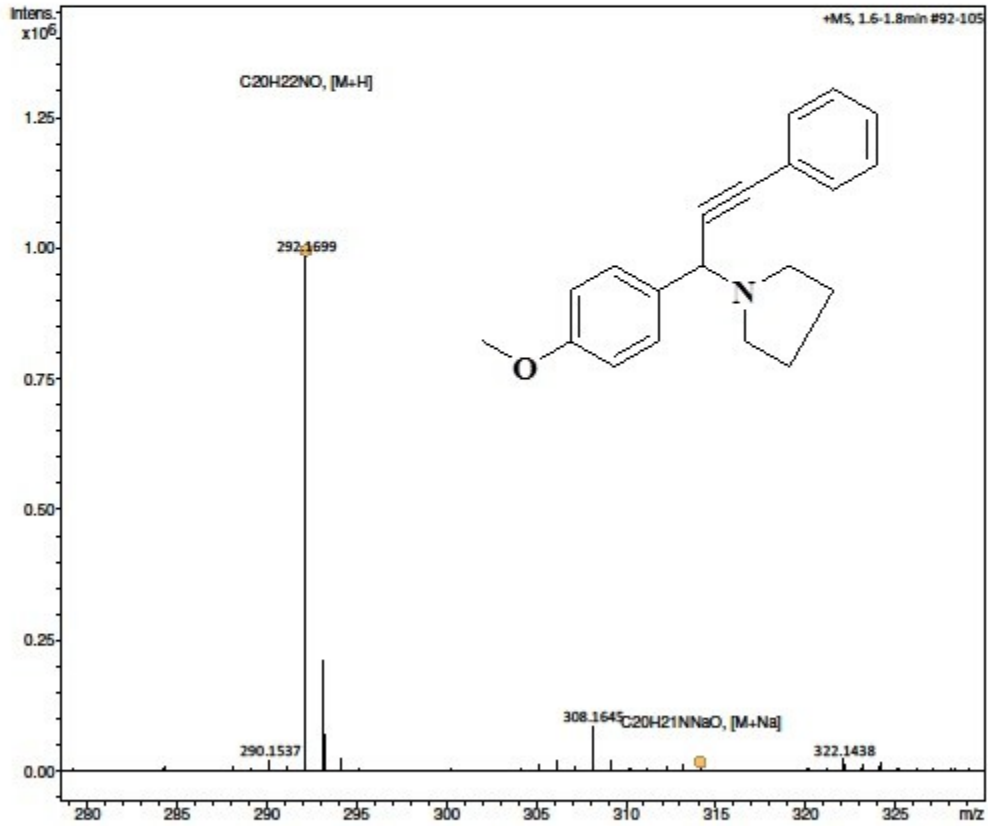

| Meas. m/z | # | Ion Formula                          | m/z      | err [ppm] | mSigma | # mSigma | Score  | rdb  | e <sup>-</sup> | Conf | N-Rule | Adduct |
|-----------|---|--------------------------------------|----------|-----------|--------|----------|--------|------|----------------|------|--------|--------|
| 292.1699  | 1 | C <sub>20</sub> H <sub>22</sub> NO   | 292.1696 | -0.9      | 6.4    | 1        | 100.00 | 10.5 | even           |      | ok     | M+H    |
| 314.1534  | 1 | C <sub>20</sub> H <sub>21</sub> NNaO | 314.1515 | -6.1      | 90.6   | 1        | 100.00 | 10.5 | even           |      | ok     | M+Na   |



# <sup>1</sup>H NMR (Table 3, Entry 3)

DB-130

Proton\_spin CDCl3 {E:\AWATE COLLEGE} Snehal 13

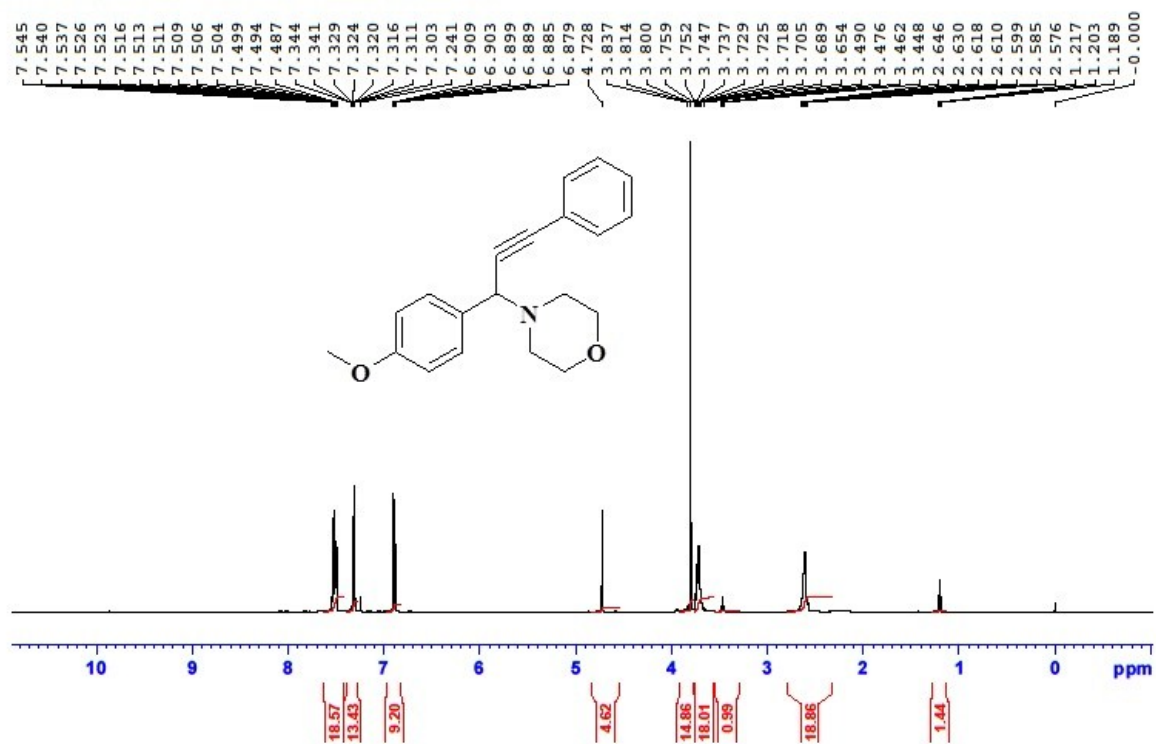

# <sup>13</sup>C NMR (Table 3, Entry 3)

DB-130

C13CPD CDC13 {E:\AWATE COLLEGE} Snehal 12

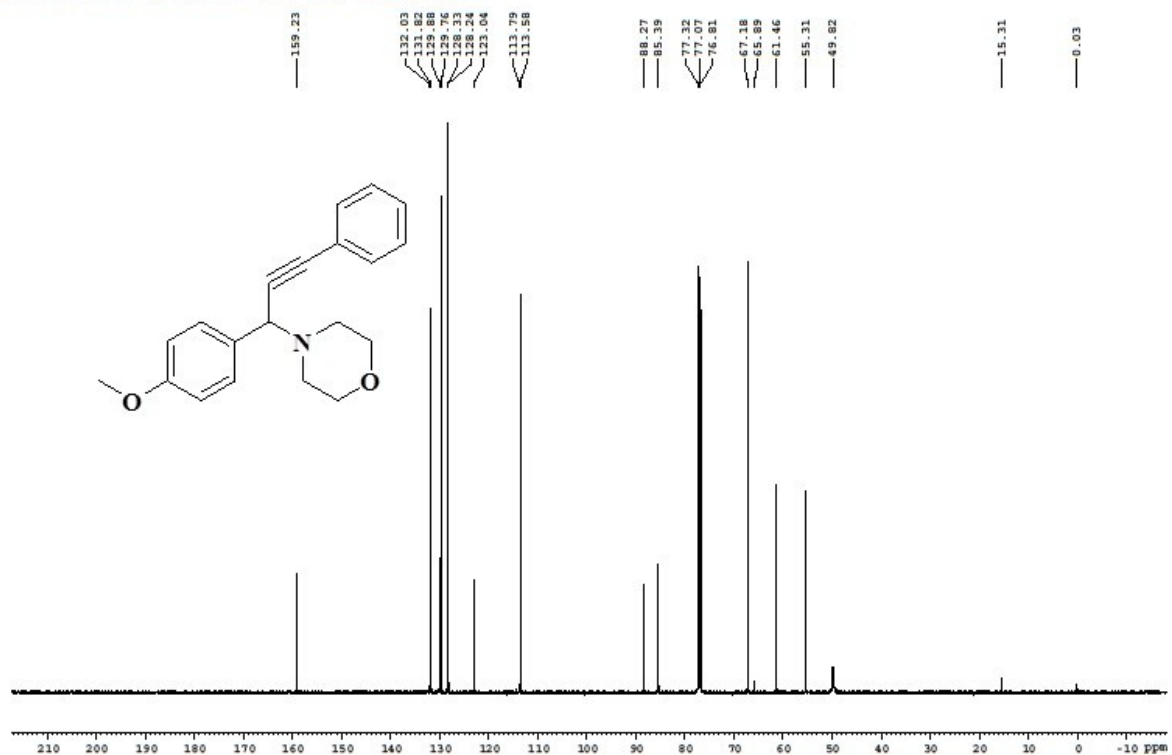

### HRMS (Table 3, Entry 3)

#### Savitribai Phule Pune University - Central Instrumentation Facility

|                      |                                                                                                                    |                  |                      |               |
|----------------------|--------------------------------------------------------------------------------------------------------------------|------------------|----------------------|---------------|
| <b>Analysis Info</b> |                                                                                                                    | Acquisition Date | 10/7/2017 2:54:29 PM |               |
| Analysis Name        | D:\Data\2017\SEPTEMBER\SPPU AFFILIATED\ANNASAHEB AWATE COLLEGE MANCHARI K G KANADE\BANKAR D B\DB-130_BE7_01_4442.d |                  |                      |               |
| Method               | dio-ms600mz_10min.m                                                                                                | Operator         | CIF                  |               |
| Sample Name          | DB-130                                                                                                             | Instrument       | impact HD            | 1819696.00184 |
| Comment              |                                                                                                                    |                  |                      |               |

|                              |         |                      |          |                  |           |
|------------------------------|---------|----------------------|----------|------------------|-----------|
| <b>Acquisition Parameter</b> |         |                      |          |                  |           |
| Source Type                  | ESI     | Ion Polarity         | Positive | Set Nebulzer     | 0.3 Bar   |
| Focus                        | Active  | Set Capillary        | 3500 V   | Set Dry Heater   | 200 °C    |
| Scan Begin                   | 50 m/z  | Set End Plate Offset | -500 V   | Set Dry Gas      | 4.0 l/min |
| Scan End                     | 600 m/z | Set Charging Voltage | 2000 V   | Set Divert Valve | Waste     |
|                              |         | Set Corona           | 0 nA     | Set APCI Heater  | 0 °C      |

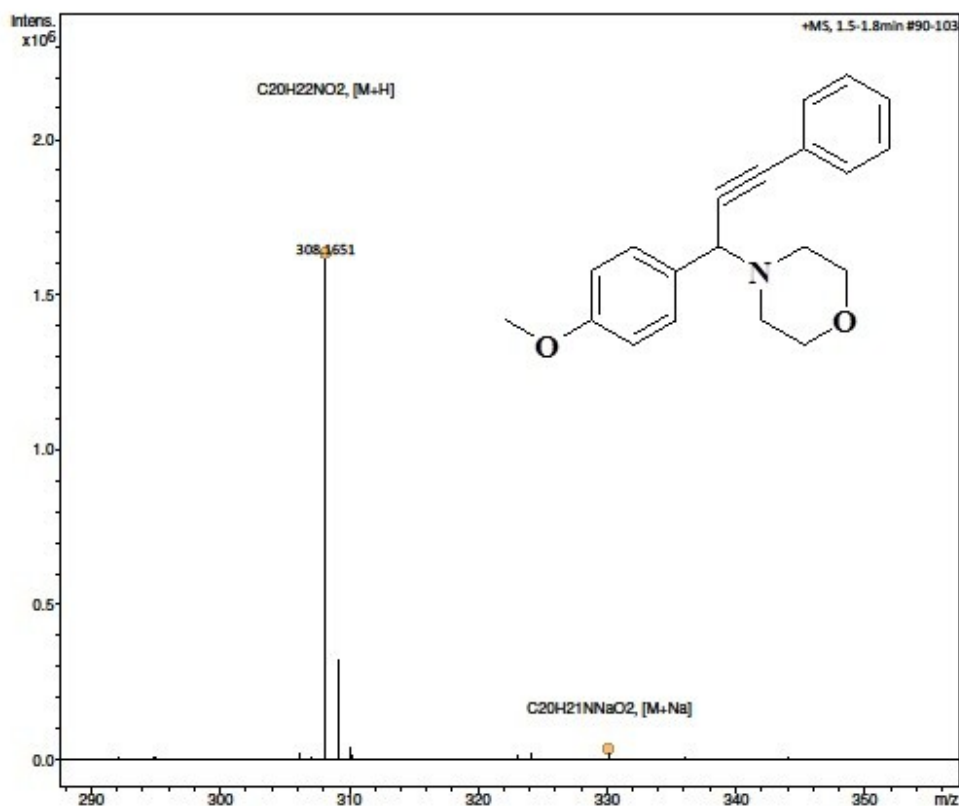

| Meas. m/z | # | Ion Formula | m/z      | err [ppm] | mSigma | # mSigma | Score  | rdb  | e <sup>-</sup> | Conf | N-Rule | Adduct |
|-----------|---|-------------|----------|-----------|--------|----------|--------|------|----------------|------|--------|--------|
| 308.1651  | 1 | C20H22NO2   | 308.1645 | -2.1      | 14.1   | 1        | 100.00 | 10.5 | even           |      | ok     | M+H    |
| 330.1469  | 1 | C20H21NNaO2 | 330.1464 | -1.3      | 16.2   | 1        | 100.00 | 10.5 | even           |      | ok     | M+Na   |

DB-130\_BE7\_01\_4442.d

Bruker Compass DataAnalysis 4.2

printed: 10/7/2017 3:12:30 PM

by: CIF

Page 1 of 1

<sup>1</sup>H NMR (Table 3, Entry 4)

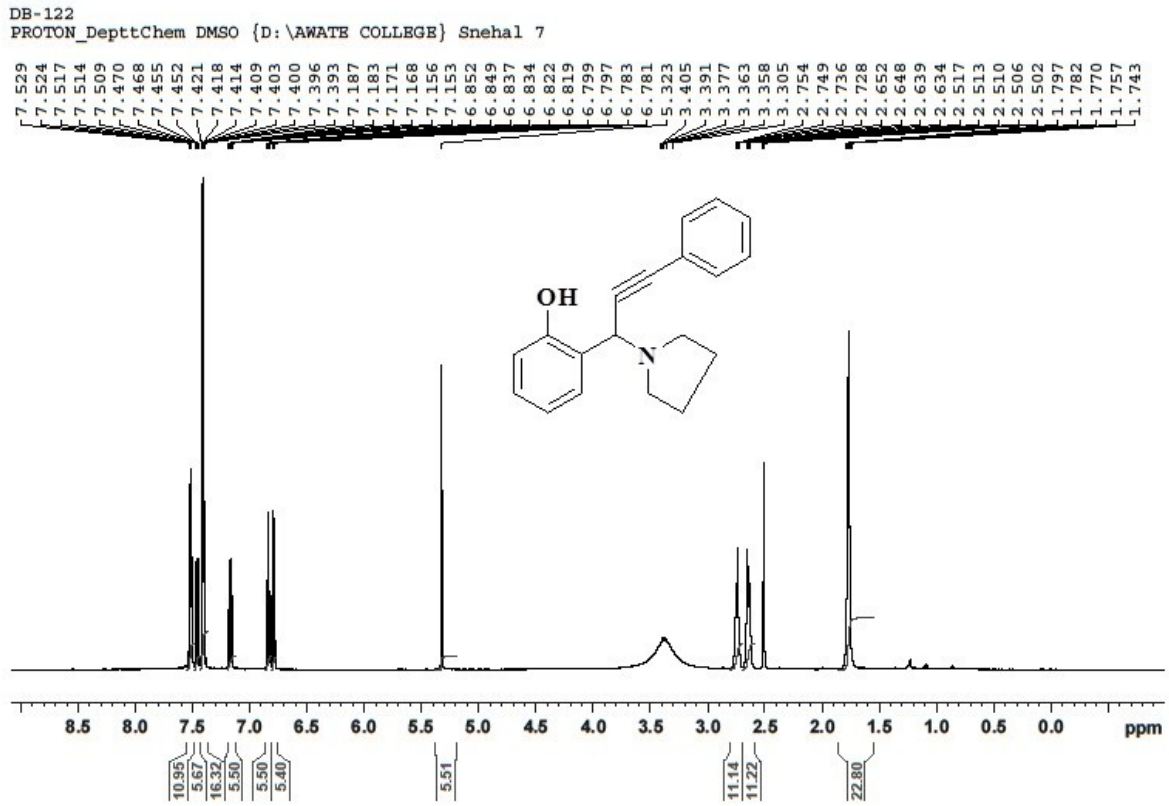

# <sup>13</sup>C NMR (Table 3, Entry 4)

DB-122

C13CPD DMSO {D:\AWATE COLLEGE} Snehal 7

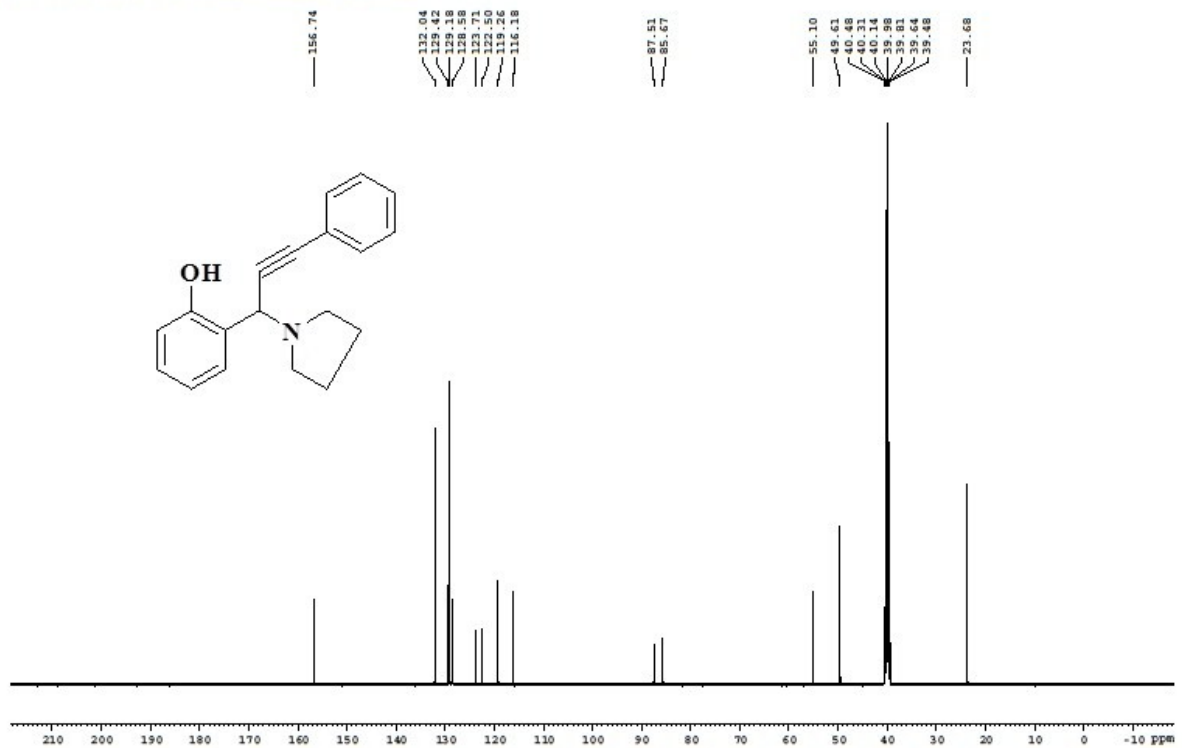

### HRMS (Table 3, Entry 4)

| Savitribai Phule Pune University - Central Instrumentation Facility |                                                                                                      |                      |                                        |                  |               |
|---------------------------------------------------------------------|------------------------------------------------------------------------------------------------------|----------------------|----------------------------------------|------------------|---------------|
| <b>Analysis Info</b>                                                |                                                                                                      |                      | Acquisition Date 8/10/2017 11:58:57 AM |                  |               |
| Analysis Name                                                       | D:\Data\2017\JUNE\SPPU AFFILIATED\A AWATE COLLEGE, MANCHAR\KG KANADE\DB BANKAR\DB -122_BD7_01_4164.d |                      |                                        |                  |               |
| Method                                                              | dlo-ms600mz_10min.m                                                                                  |                      | Operator                               | CIF              |               |
| Sample Name                                                         | DB -122                                                                                              |                      | Instrument                             | impact HD        | 1819696.00184 |
| Comment                                                             |                                                                                                      |                      |                                        |                  |               |
| <b>Acquisition Parameter</b>                                        |                                                                                                      |                      |                                        |                  |               |
| Source Type                                                         | ESI                                                                                                  | Ion Polarity         | Positive                               | Set Nebulzer     | 0.3 Bar       |
| Focus                                                               | Active                                                                                               | Set Capillary        | 3500 V                                 | Set Dry Heater   | 200 °C        |
| Scan Begin                                                          | 50 m/z                                                                                               | Set End Plate Offset | -500 V                                 | Set Dry Gas      | 4.0 l/min     |
| Scan End                                                            | 600 m/z                                                                                              | Set Charging Voltage | 2000 V                                 | Set Divert Valve | Waste         |
|                                                                     |                                                                                                      | Set Corona           | 0 nA                                   | Set APCI Heater  | 0 °C          |

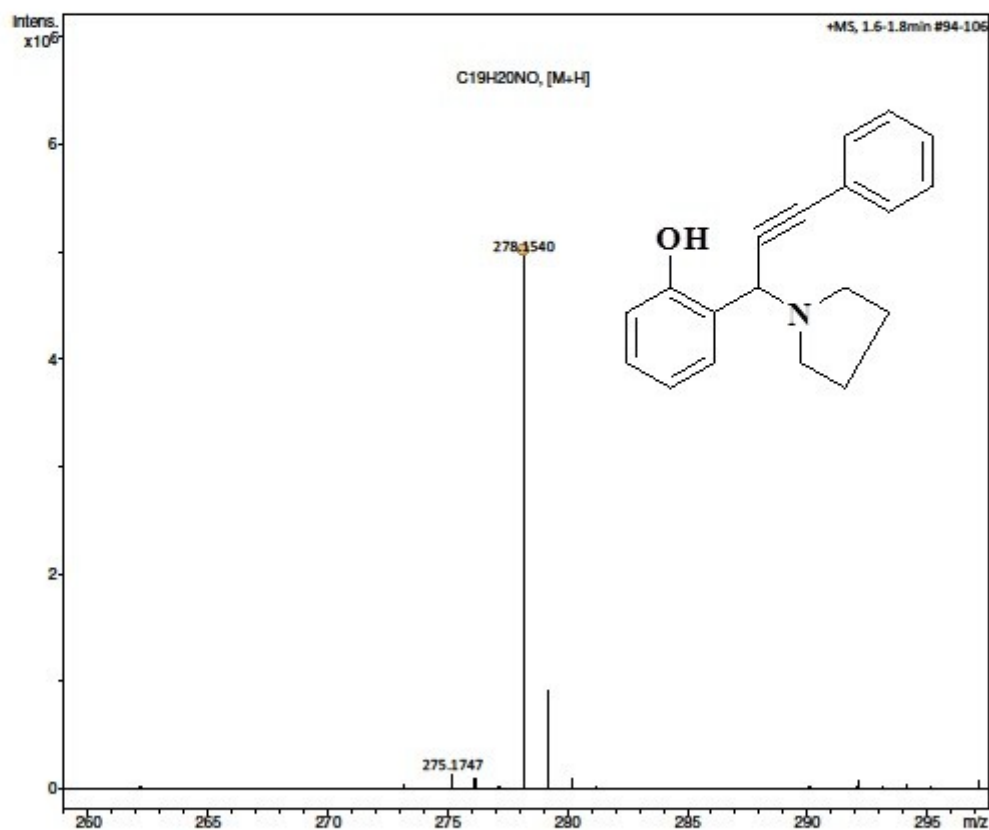

| Meas. m/z | # | Ion Formula | m/z      | err [ppm] | mSigma | # mSigma | Score  | rdb  | e <sup>-</sup> | Conf | N-Rule | Adduct |
|-----------|---|-------------|----------|-----------|--------|----------|--------|------|----------------|------|--------|--------|
| 278.1540  | 1 | C19H20NO    | 278.1539 | -0.0      | 16.1   | 1        | 100.00 | 10.5 | even           |      | ok     | M+H    |

DB -122\_BD7\_01\_4164.d

Bruker Compass DataAnalysis 4.2

printed: 8/10/2017 12:52:05 PM

by: CIF

Page 1 of 1

# <sup>1</sup>H NMR (Table 3, Entry 5)

DB-128

Proton\_spin DMSO {E:\AWATE COLLEGE} Snehal 18

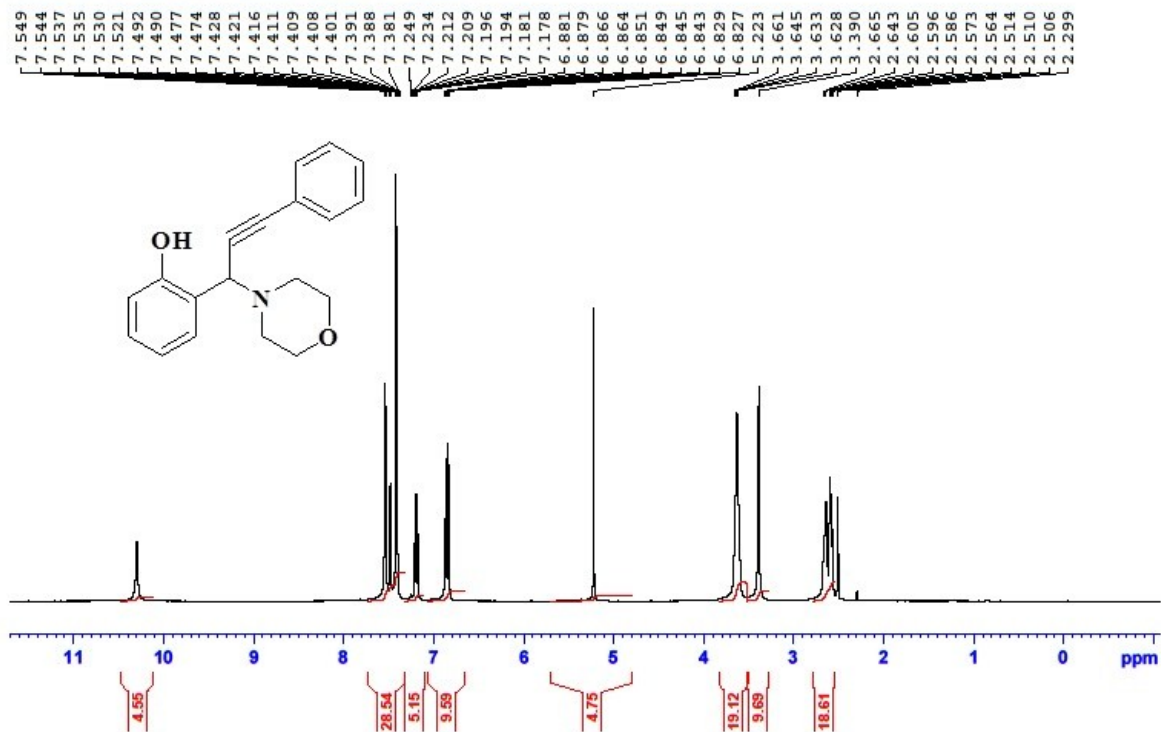

# <sup>13</sup>C NMR (Table 3, Entry 5)

DB-128  
C13CPD CDC13 {E:\AWATE COLLEGE} Snehal 10

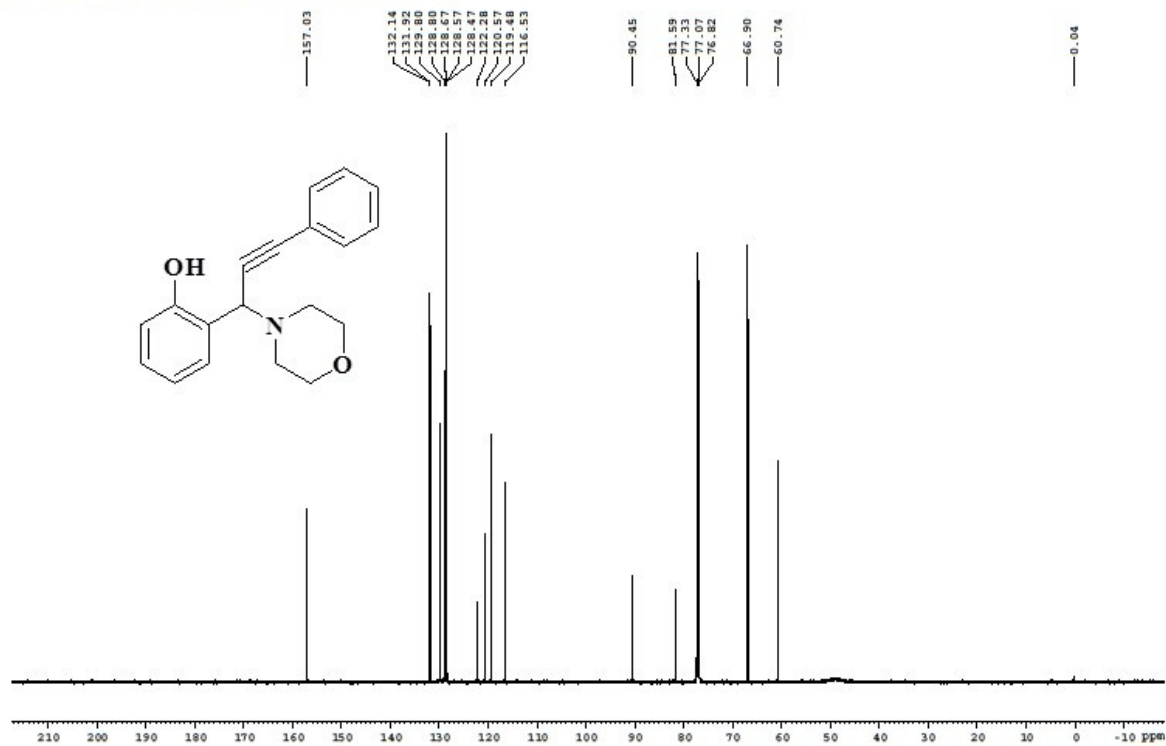



HRMS (Table 3, Entry 5)

Savitribai Phule Pune University - Central Instrumentation Facility

**Analysis Info**  
 Analysis Name: D:\Data\2017\SEPTEMBER\SPPU AFFILIATED\ANNASAHEB AWATE COLLEGE MANCHAR\K G KANADE\BANKAR D B\DB-127\_BE5\_01\_4440.d  
 Method: dlc-ms600mz\_10min.m  
 Sample Name: DB-127  
 Comment:  
 Acquisition Date: 10/7/2017 2:24:14 PM  
 Operator: CIF  
 Instrument: impact HD  
 1819696.00184

**Acquisition Parameter**

|             |         |                      |          |                  |           |
|-------------|---------|----------------------|----------|------------------|-----------|
| Source Type | ESI     | Ion Polarity         | Positive | Set Nebulizer    | 0.3 Bar   |
| Focus       | Active  | Set Capillary        | 3500 V   | Set Dry Heater   | 200 °C    |
| Scan Begin  | 50 m/z  | Set End Plate Offset | -500 V   | Set Dry Gas      | 4.0 l/min |
| Scan End    | 600 m/z | Set Charging Voltage | 2000 V   | Set Divert Valve | Waste     |
|             |         | Set Corona           | 0 nA     | Set APCI Heater  | 0 °C      |

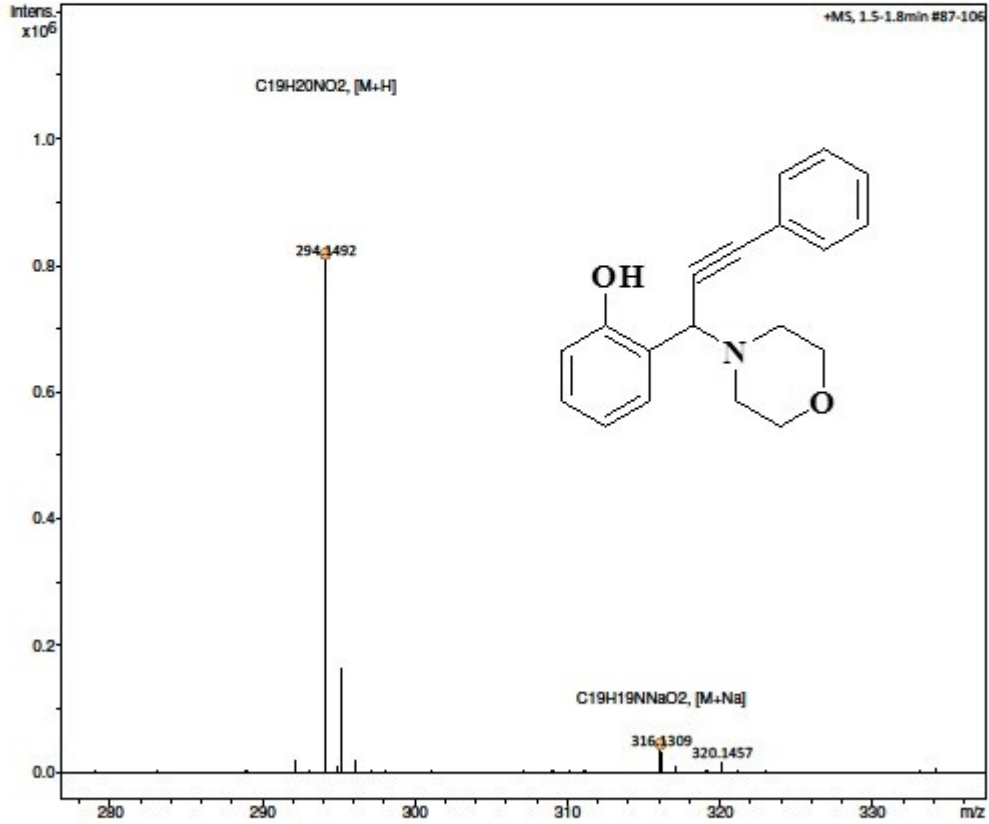

| Meas. m/z | # | Ion Formula                                       | m/z      | err [ppm] | mSigma | # mSigma | Score  | rdb  | e <sup>-</sup> | Conf | N-Rule | Adduct |
|-----------|---|---------------------------------------------------|----------|-----------|--------|----------|--------|------|----------------|------|--------|--------|
| 294.1492  | 1 | C <sub>19</sub> H <sub>20</sub> NO <sub>2</sub>   | 294.1489 | -1.2      | 6.8    | 1        | 100.00 | 10.5 | even           |      | ok     | M+H    |
| 316.1309  | 1 | C <sub>19</sub> H <sub>19</sub> NNaO <sub>2</sub> | 316.1308 | -0.2      | 2.5    | 1        | 100.00 | 10.5 | even           |      | ok     | M+Na   |

DB-127\_BE5\_01\_4440.d

Bruker Compass DataAnalysis 4.2

printed: 10/7/2017 2:45:49 PM

by: CIF

Page 1 of 1

# <sup>1</sup>H NMR (Table 3, Entry 6)

DB-132

Proton\_spin CDCl3 {E:\AWATE COLLEGE} Snehal 15

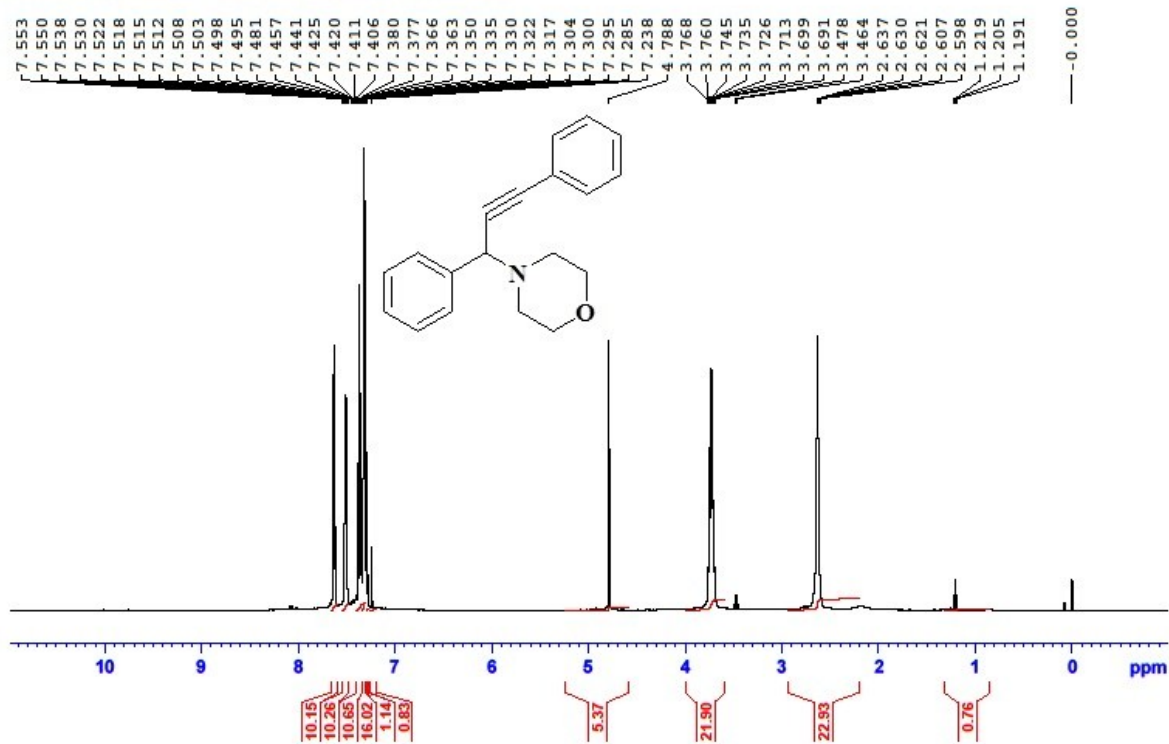

# <sup>13</sup>C NMR (Table 3, Entry 6)

DB-132  
C13CPD CDC13 {E:\AWATE COLLEGE} Snehal 14

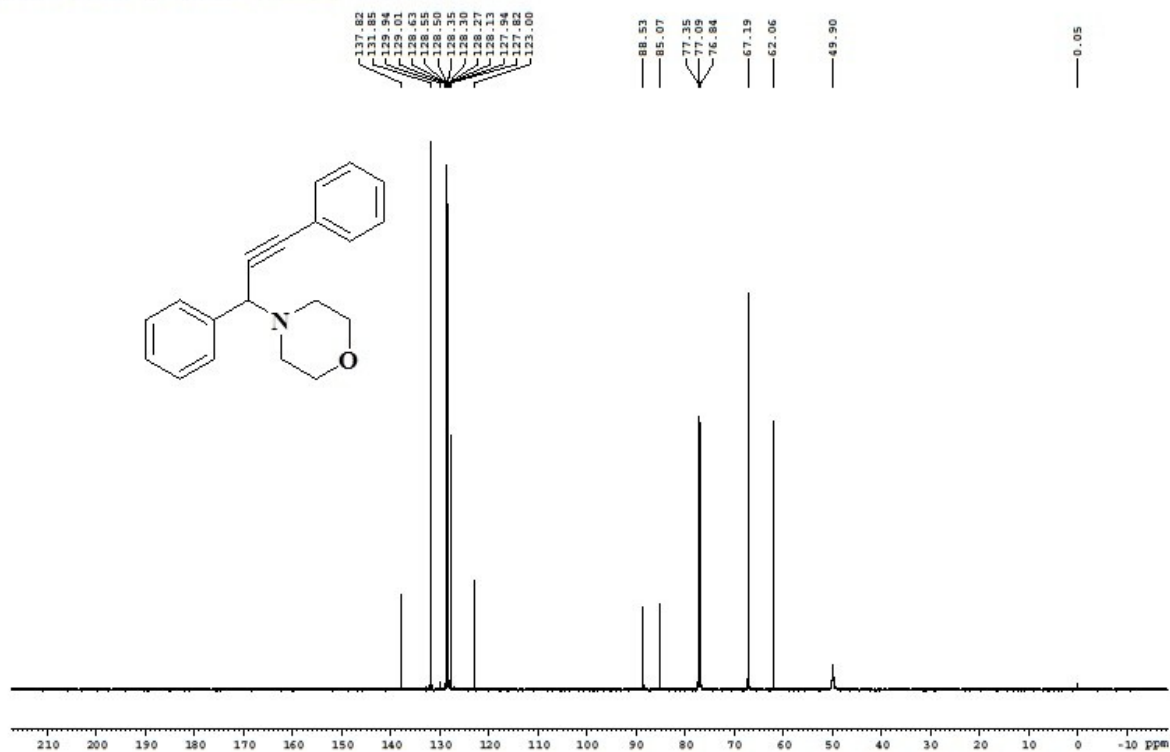

HRMS (Table 3, Entry 6)

Savitribai Phule Pune University - Central Instrumentation Facility

**Analysis Info**  
 Analysis Name: D:\Data\2017\SEPTEMBER\SPPU AFFILIATED\ANNASAHEB AWATE COLLEGE MANCHAR\K G KANADE\BANKAR D B\DB-132\_BD8\_01\_4444.d  
 Method: dlc-ms600mz\_10min.m  
 Sample Name: DB-132  
 Comment:  
 Acquisition Date: 10/7/2017 3:19:15 PM  
 Operator: CIF  
 Instrument: impact HD  
 1819696.00184

**Acquisition Parameter**

|             |         |                      |          |                  |           |
|-------------|---------|----------------------|----------|------------------|-----------|
| Source Type | ESI     | Ion Polarity         | Positive | Set Nebulzer     | 0.3 Bar   |
| Focus       | Active  | Set Capillary        | 3500 V   | Set Dry Heater   | 200 °C    |
| Scan Begin  | 50 m/z  | Set End Plate Offset | -500 V   | Set Dry Gas      | 4.0 l/min |
| Scan End    | 600 m/z | Set Charging Voltage | 2000 V   | Set Divert Valve | Waste     |
|             |         | Set Corona           | 0 nA     | Set APCI Heater  | 0 °C      |

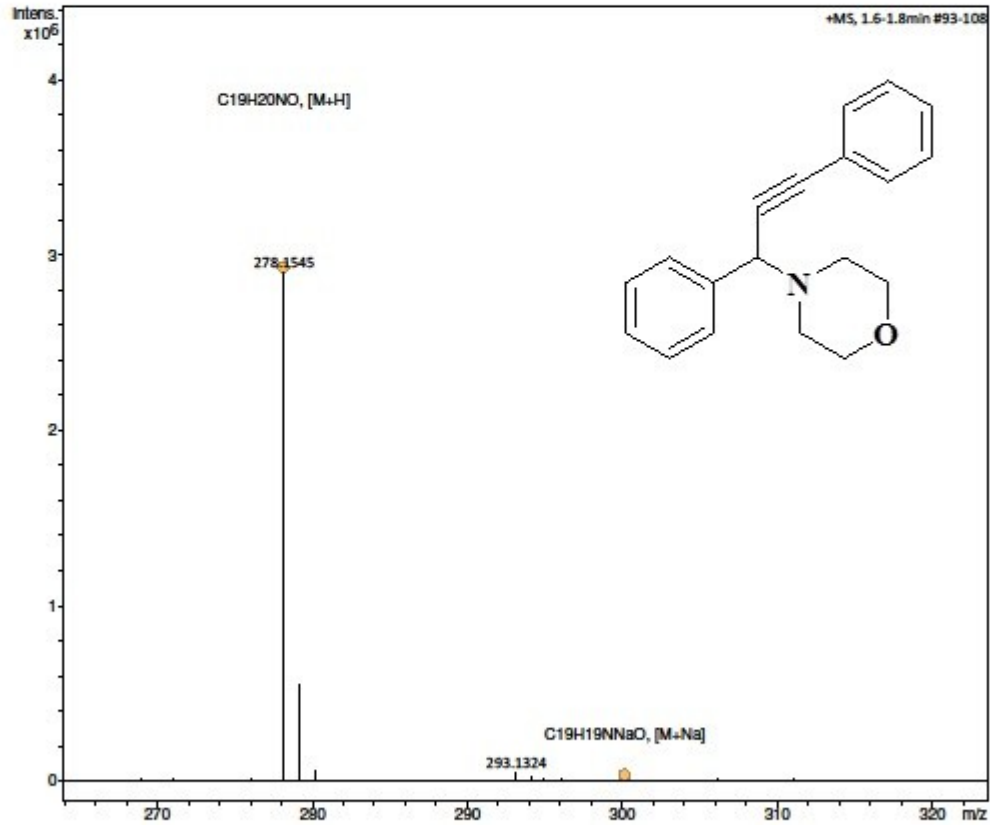

| Meas. m/z | # | Ion Formula | m/z      | err [ppm] | mSigma | # mSigma | Score  | rdb  | e <sup>-</sup> | Conf | N-Rule | Adduct |
|-----------|---|-------------|----------|-----------|--------|----------|--------|------|----------------|------|--------|--------|
| 278.1545  | 1 | C19H20NO    | 278.1539 | -2.1      | 14.3   | 1        | 100.00 | 10.5 | even           |      | ok     | M+H    |
| 300.1365  | 1 | C19H19NNaO  | 300.1359 | -2.1      | 451.4  | 1        | 100.00 | 10.5 | even           |      | ok     | M+Na   |

DB-132\_BD8\_01\_4444.d

Bruker Compass DataAnalysis 4.2

printed: 10/7/2017 3:34:13 PM

by: CIF

Page 1 of 1

# <sup>1</sup>H NMR (Table 3, Entry 7)

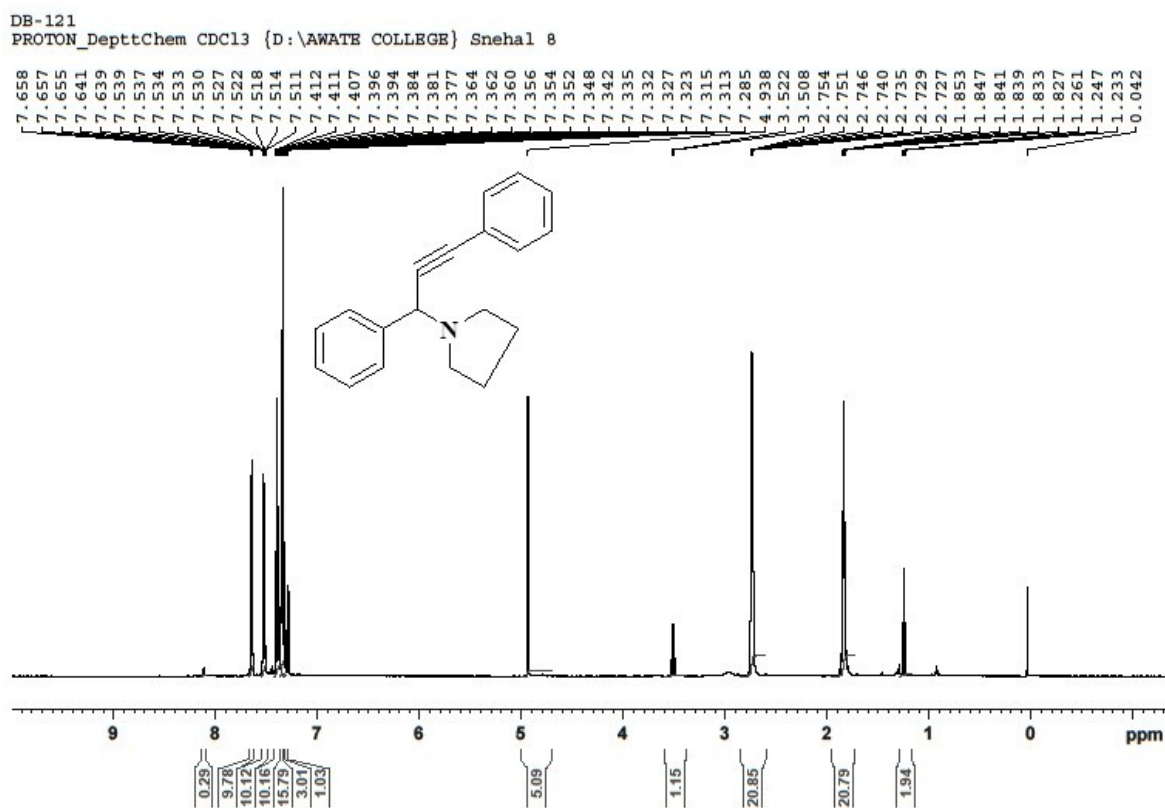

# <sup>13</sup>C NMR (Table 3, Entry 7)

DB-121  
C13CPD CDC13 {D:\AWATE COLLEGE} Snehal 8

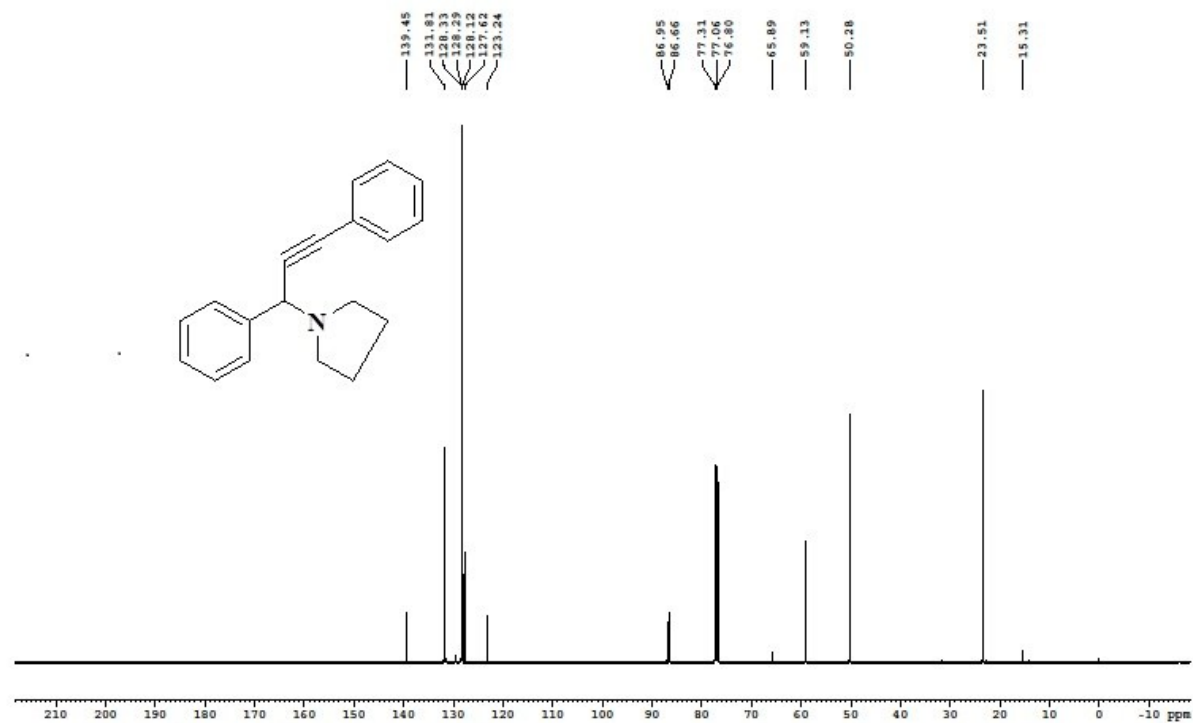

HRMS (Table 3, Entry 7)

Savitribai Phule Pune University - Central Instrumentation Facility

**Analysis Info**  
 Analysis Name D:\Data\2017\JUNE\SPPU AFFILIATED\A AWATE COLLEGE, MANCHAR\KG KANADE\DB BANKAR\DB -121\_BD6\_01\_4163.d  
 Method dlo-ms600mz\_10min.m  
 Sample Name DB -121  
 Comment

Acquisition Date 8/10/2017 11:33:18 AM  
 Operator CIF  
 Instrument impact HD 1819696.00184

**Acquisition Parameter**

|             |         |                      |          |                  |           |
|-------------|---------|----------------------|----------|------------------|-----------|
| Source Type | ESI     | Ion Polarity         | Positive | Set Nebulizer    | 0.3 Bar   |
| Focus       | Active  | Set Capillary        | 3500 V   | Set Dry Heater   | 200 °C    |
| Scan Begin  | 50 m/z  | Set End Plate Offset | -500 V   | Set Dry Gas      | 4.0 l/min |
| Scan End    | 600 m/z | Set Charging Voltage | 2000 V   | Set Divert Valve | Waste     |
|             |         | Set Corona           | 0 nA     | Set APCI Heater  | 0 °C      |

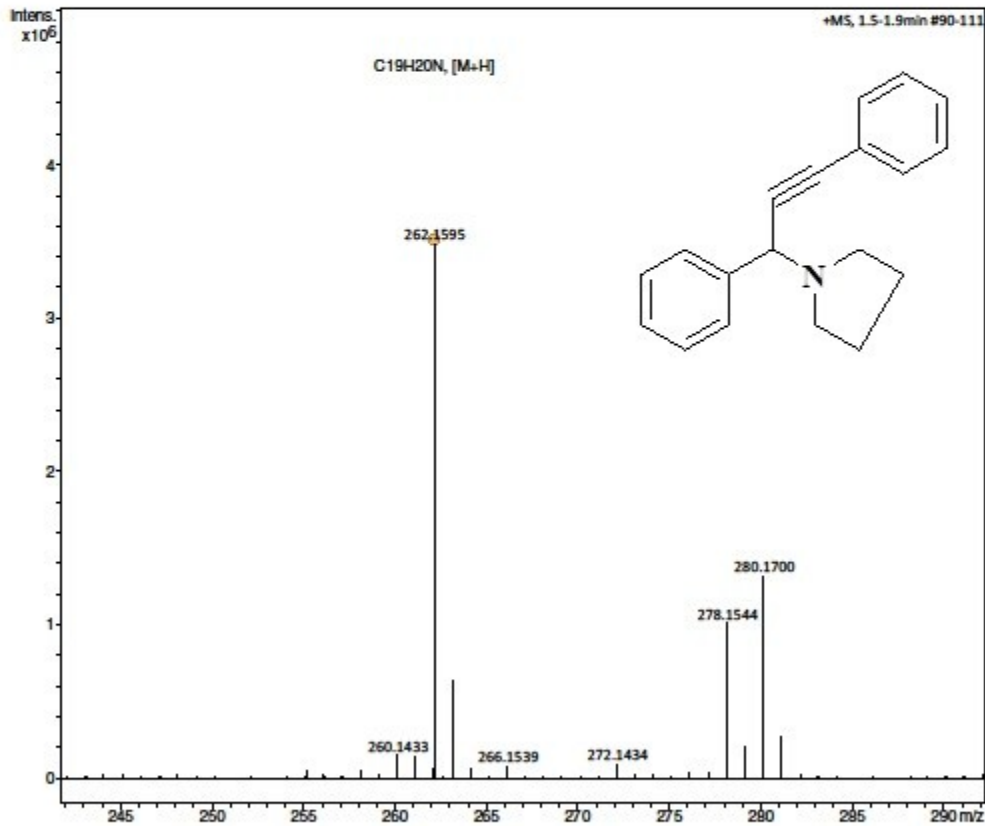

| Meas. m/z | # | Ion Formula                       | m/z      | err [ppm] | mSigma | # mSigma | Score  | rdb  | e <sup>-</sup> | Conf | N-Rule |
|-----------|---|-----------------------------------|----------|-----------|--------|----------|--------|------|----------------|------|--------|
| 262.1595  | 1 | C <sub>19</sub> H <sub>20</sub> N | 262.1590 | -1.7      | 17.0   | 1        | 100.00 | 10.5 | even           |      | ok     |

<sup>1</sup>H NMR (Table 3, Entry 8)

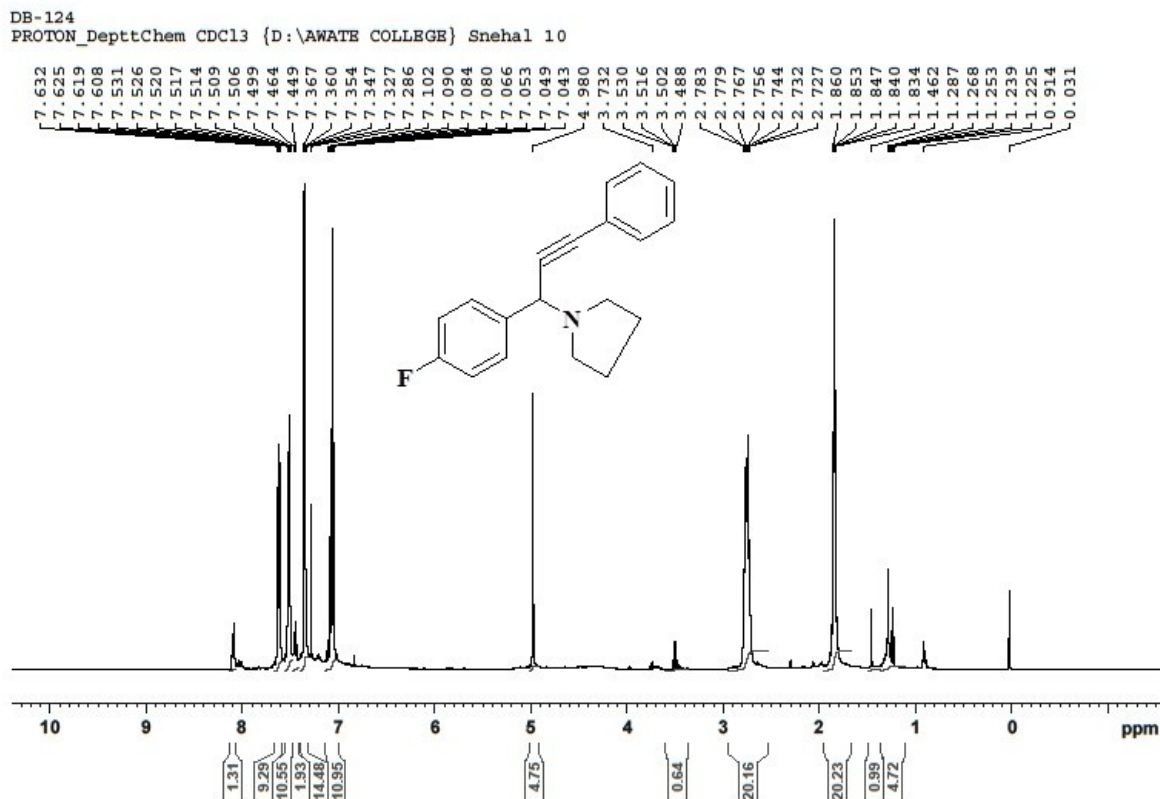



# <sup>13</sup>C NMR (Table 3, Entry 8)

DB-124  
C13CPD CDC13 {D:\AWATE COLLEGE} Snehal 10

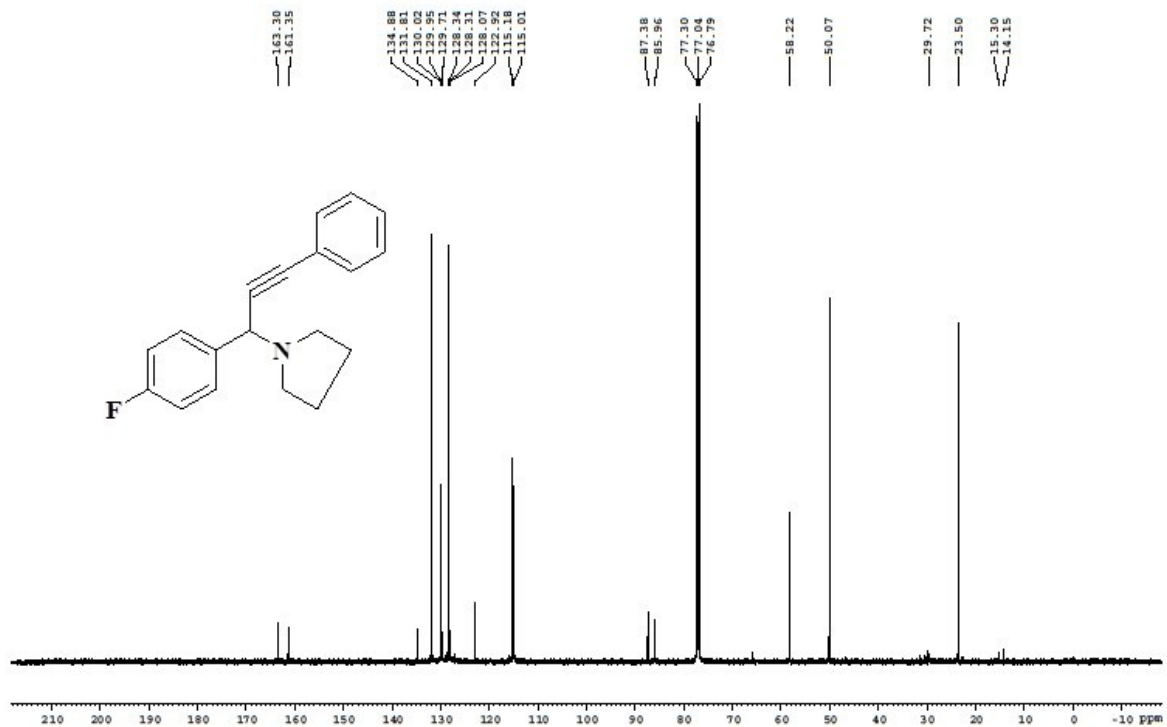

HRMS (Table 3, Entry 8)

Savitribai Phule Pune University - Central Instrumentation Facility

**Analysis Info**  
 Analysis Name: D:\Data\2017\JUNE\SPPU AFFILIATED\A AWATE COLLEGE, MANCHAR\KG KANADE\DB BANKAR\DB -124\_BE1\_01\_4166.d  
 Method: dlc-ms600mz\_10min.m  
 Sample Name: DB -124  
 Comment:  
 Acquisition Date: 8/10/2017 12:28:47 PM  
 Operator: CIF  
 Instrument: impact HD 1819696.00184

**Acquisition Parameter**

|             |         |                      |          |                  |           |
|-------------|---------|----------------------|----------|------------------|-----------|
| Source Type | ESI     | Ion Polarity         | Positive | Set Nebulizer    | 0.3 Bar   |
| Focus       | Active  | Set Capillary        | 3500 V   | Set Dry Heater   | 200 °C    |
| Scan Begin  | 50 m/z  | Set End Plate Offset | -500 V   | Set Dry Gas      | 4.0 l/min |
| Scan End    | 600 m/z | Set Charging Voltage | 2000 V   | Set Divert Valve | Waste     |
|             |         | Set Corona           | 0 nA     | Set APCI Heater  | 0 °C      |

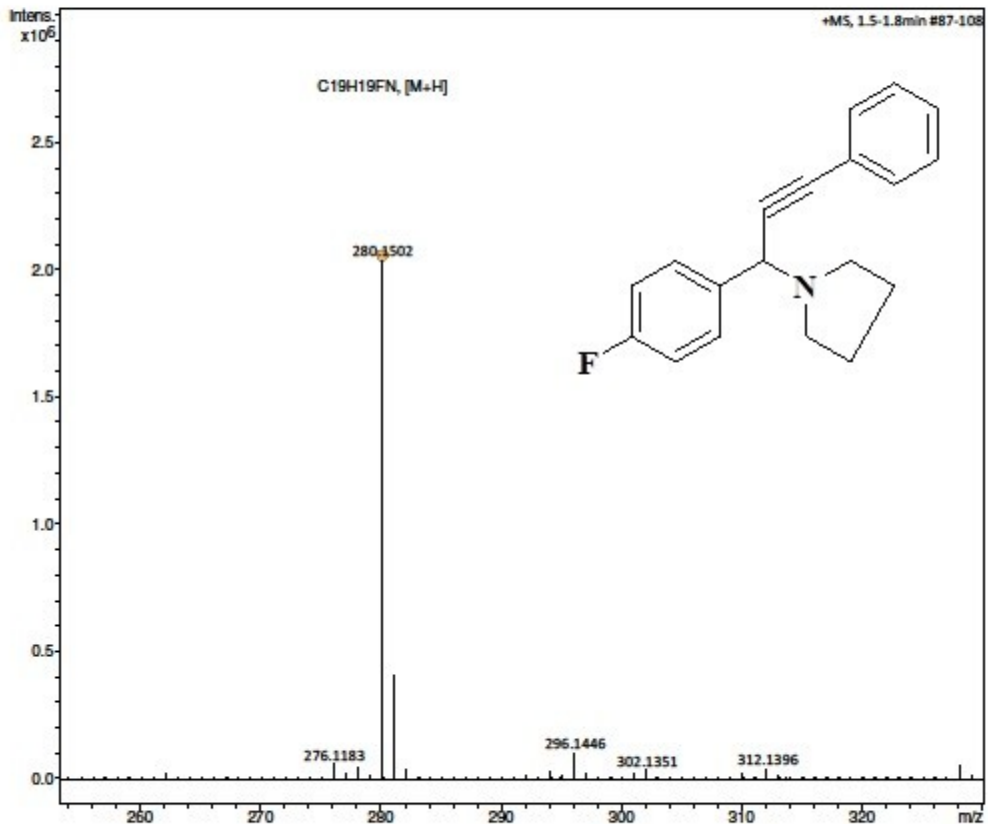

| Meas. m/z | # | Ion Formula                       | m/z      | err [ppm] | mSigma | # | mSigma | Score | rdb  | e <sup>-</sup> | Conf | N-Rule | Adduct |
|-----------|---|-----------------------------------|----------|-----------|--------|---|--------|-------|------|----------------|------|--------|--------|
| 280.1502  | 1 | C <sub>19</sub> H <sub>19</sub> N | 280.1496 | -2.2      | 7.7    | 1 | 100.00 | 10.5  | even |                |      | ok     | M+H    |

# <sup>1</sup>H NMR (Table 3, Entry 9)

DB-126

Proton\_spin CDCl3 {E:\AWATE COLLEGE} Snehal 11

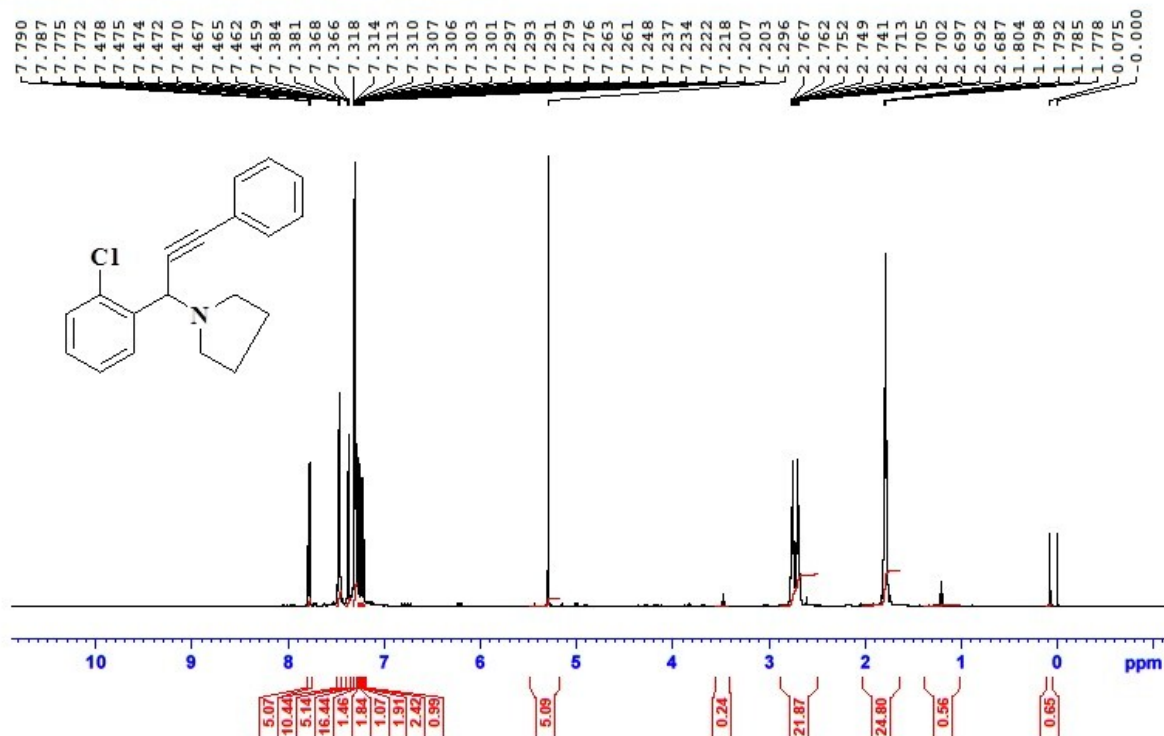

# <sup>13</sup>C NMR (Table 3, Entry 9)

DB-126

C13CPD CDC13 {E:\AWATE COLLEGE} Snehal 8

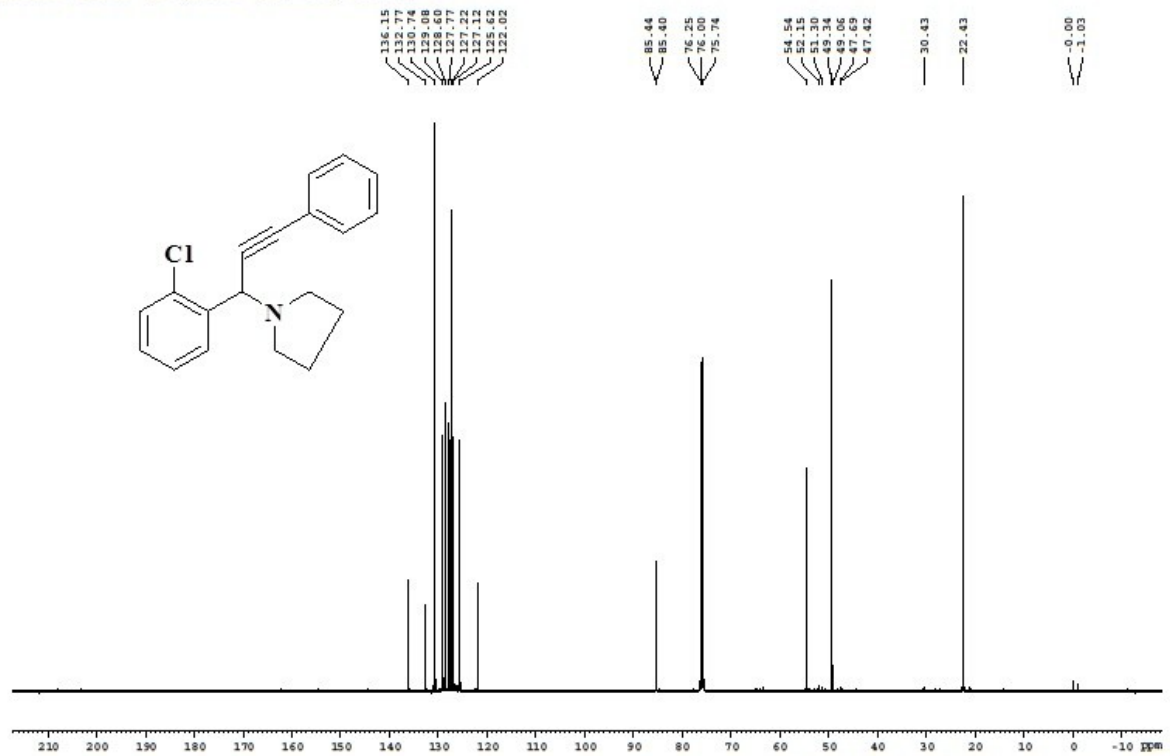

HRMS (Table 3, Entry 9)

Savitribai Phule Pune University - Central Instrumentation Facility

**Analysis Info**  
 Analysis Name: D:\Data\2017\SEPTEMBER\SPPU AFFILIATED\ANNASAHEB AWATE COLLEGE MANCHARK G  
 KANADE\BANKAR D B\DB-126\_BD3\_01\_4438.d  
 Method: dlc-ms350mz\_10min\_90b.m  
 Sample Name: DB-126  
 Comment:  
 Acquisition Date: 10/7/2017 11:27:30 AM  
 Operator: CIF  
 Instrument: impact HD 1819696.00184

**Acquisition Parameter**

|             |         |                      |          |                  |           |
|-------------|---------|----------------------|----------|------------------|-----------|
| Source Type | ESI     | Ion Polarity         | Positive | Set Nebulizer    | 0.3 Bar   |
| Focus       | Active  | Set Capillary        | 3500 V   | Set Dry Heater   | 200 °C    |
| Scan Begin  | 50 m/z  | Set End Plate Offset | -500 V   | Set Dry Gas      | 4.0 l/min |
| Scan End    | 600 m/z | Set Charging Voltage | 2000 V   | Set Divert Valve | Waste     |
|             |         | Set Corona           | 0 nA     | Set APCI Heater  | 0 °C      |

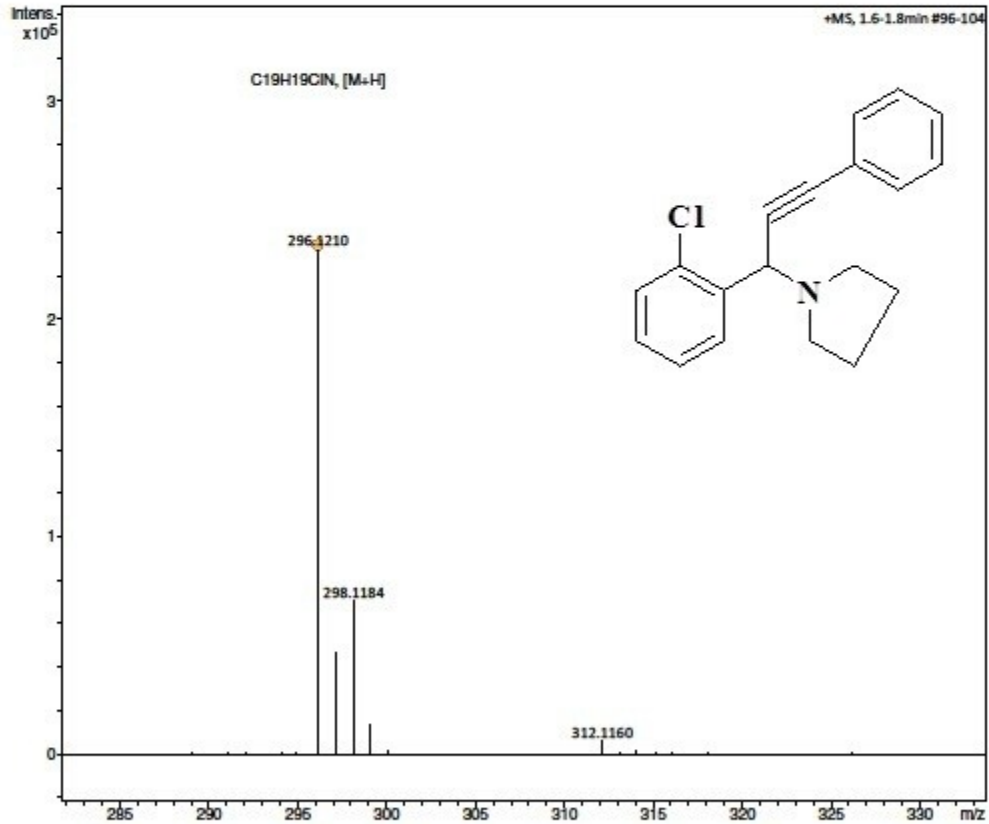

| Meas. m/z | # | Ion Formula                         | m/z      | err [ppm] | mSigma | # mSigma | Score  | rdb  | e <sup>-</sup> | Conf | N-Rule | Adduct |
|-----------|---|-------------------------------------|----------|-----------|--------|----------|--------|------|----------------|------|--------|--------|
| 296.1210  | 1 | C <sub>19</sub> H <sub>19</sub> ClN | 296.1201 | -3.4      | 19.6   | 1        | 100.00 | 10.5 | even           |      | ok     | M+H    |

DB-126\_BD3\_01\_4438.d

Bruker Compass DataAnalysis 4.2

printed: 10/7/2017 12:07:21 PM

by: CIF

Page 1 of 1

# <sup>1</sup>H NMR (Table 3, Entry 10)

DB-125

Proton\_spin CDCl3 {E:\AWATE COLLEGE} Snehal 10

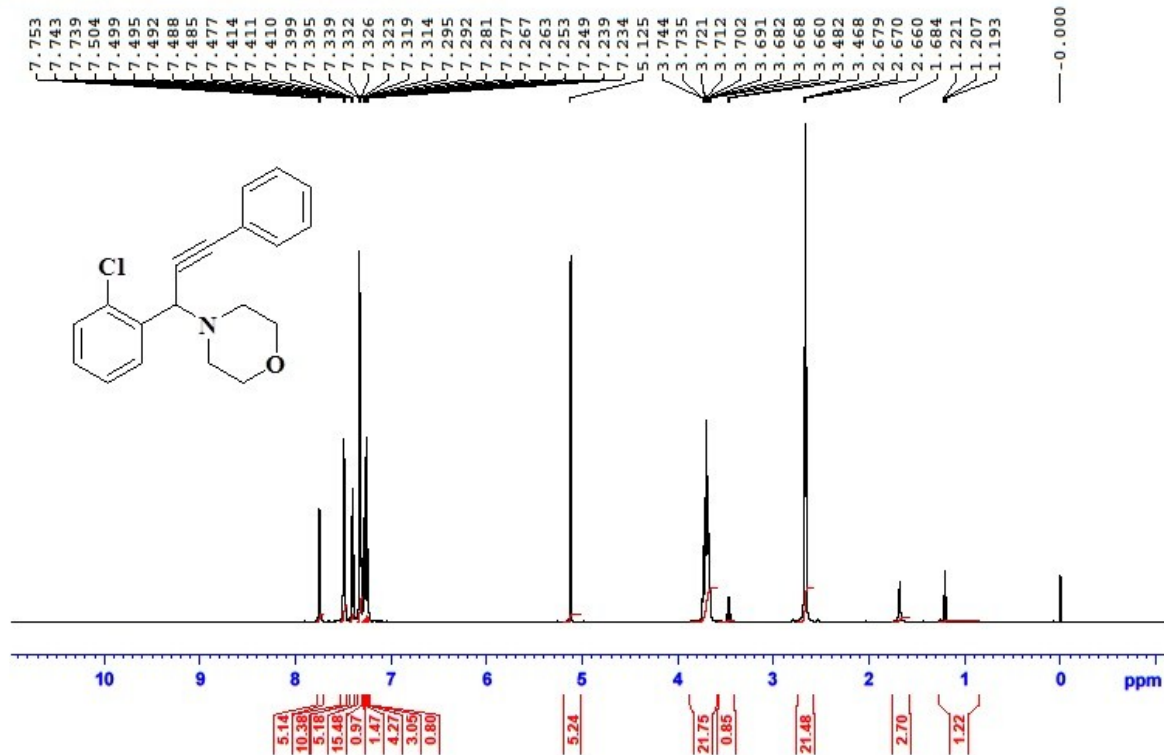

# <sup>13</sup>C NMR (Table 3, Entry 10)

DB-125  
C13CPD CDC13 {E:\AWATE COLLEGE} Snehal 7

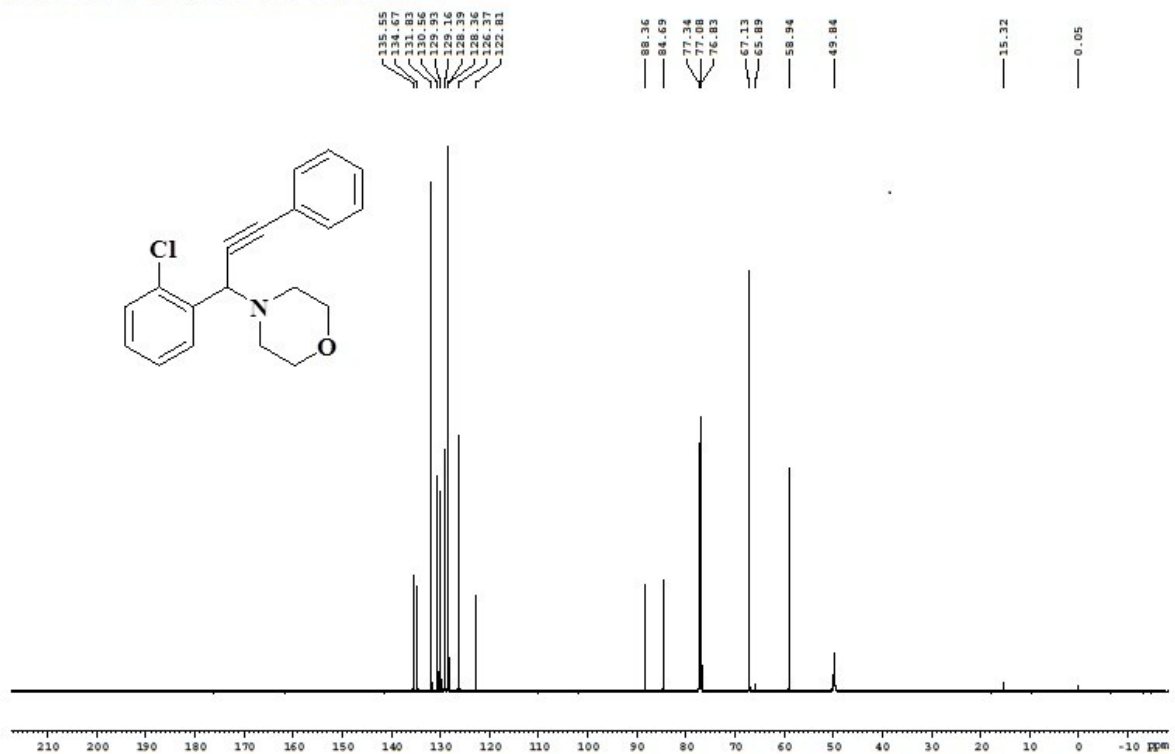

HRMS (Table 3, Entry 10)

Savitribai Phule Pune University - Central Instrumentation Facility

**Analysis Info**  
 Analysis Name: D:\Data\2017\SEPTEMBER\SPPU AFFILIATED\ANNASAHEB AWATE COLLEGE MANCHARK G  
 KANADE\BANKAR D B\DB-125\_BA6\_01\_4394.d  
 Method: dlc-ms600mz\_10min.m  
 Sample Name: DB-125  
 Comment:  
 Acquisition Date: 9/27/2017 3:23:41 PM  
 Operator: CIF  
 Instrument: impact HD  
 1819696.00184

**Acquisition Parameter**

|             |         |                      |          |                  |           |
|-------------|---------|----------------------|----------|------------------|-----------|
| Source Type | ESI     | Ion Polarity         | Positive | Set Nebulizer    | 0.3 Bar   |
| Focus       | Active  | Set Capillary        | 3500 V   | Set Dry Heater   | 200 °C    |
| Scan Begin  | 50 m/z  | Set End Plate Offset | -500 V   | Set Dry Gas      | 4.0 l/min |
| Scan End    | 600 m/z | Set Charging Voltage | 2000 V   | Set Divert Valve | Waste     |
|             |         | Set Corona           | 0 nA     | Set APCI Heater  | 0 °C      |

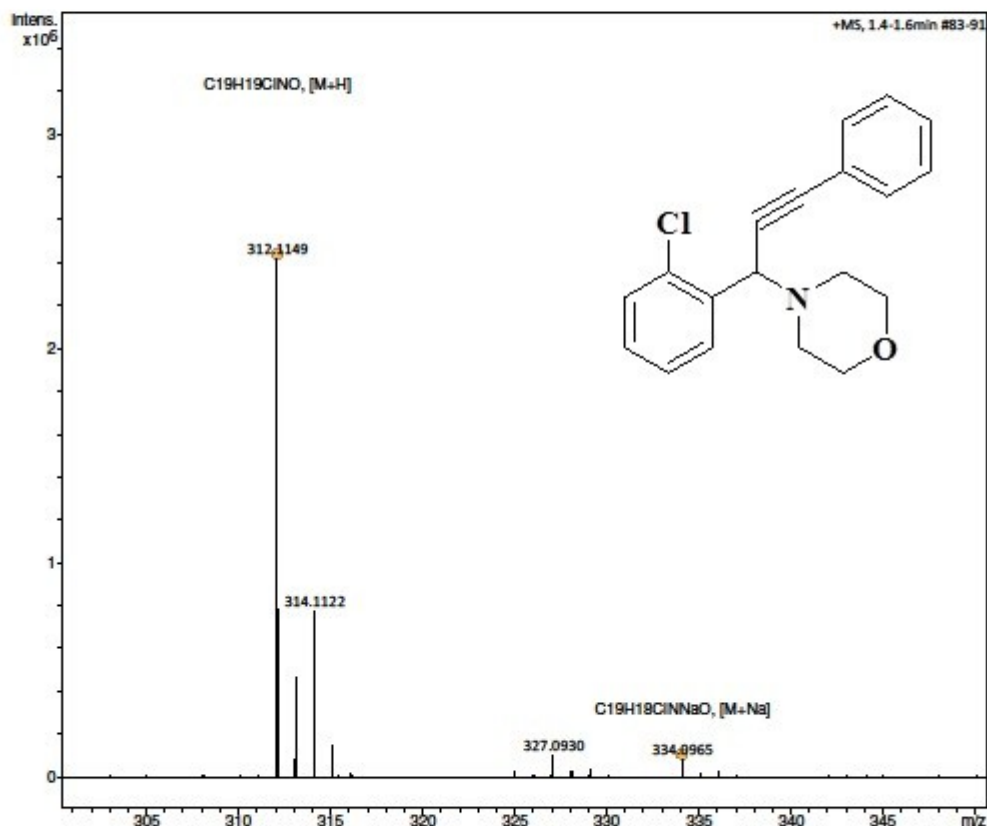

| Meas. m/z | # | Ion Formula                            | m/z      | err [ppm] | mSigma | # mSigma | Score  | rdb  | e <sup>-</sup> | Conf | N-Rule | Adduct |
|-----------|---|----------------------------------------|----------|-----------|--------|----------|--------|------|----------------|------|--------|--------|
| 312.1149  | 1 | C <sub>19</sub> H <sub>19</sub> ClNO   | 312.1150 | 0.1       | 14.5   | 1        | 100.00 | 10.5 | even           |      | ok     | M+H    |
| 334.0965  | 1 | C <sub>19</sub> H <sub>18</sub> ClNNaO | 334.0969 | 1.4       | 5.8    | 1        | 100.00 | 10.5 | even           |      | ok     | M+Na   |

DB-125\_BA6\_01\_4394.d

Bruker Compass DataAnalysis 4.2

printed: 9/27/2017 4:08:36 PM

by: CIF

Page 1 of 1



# <sup>1</sup>H NMR (Table 3, Entry 11)

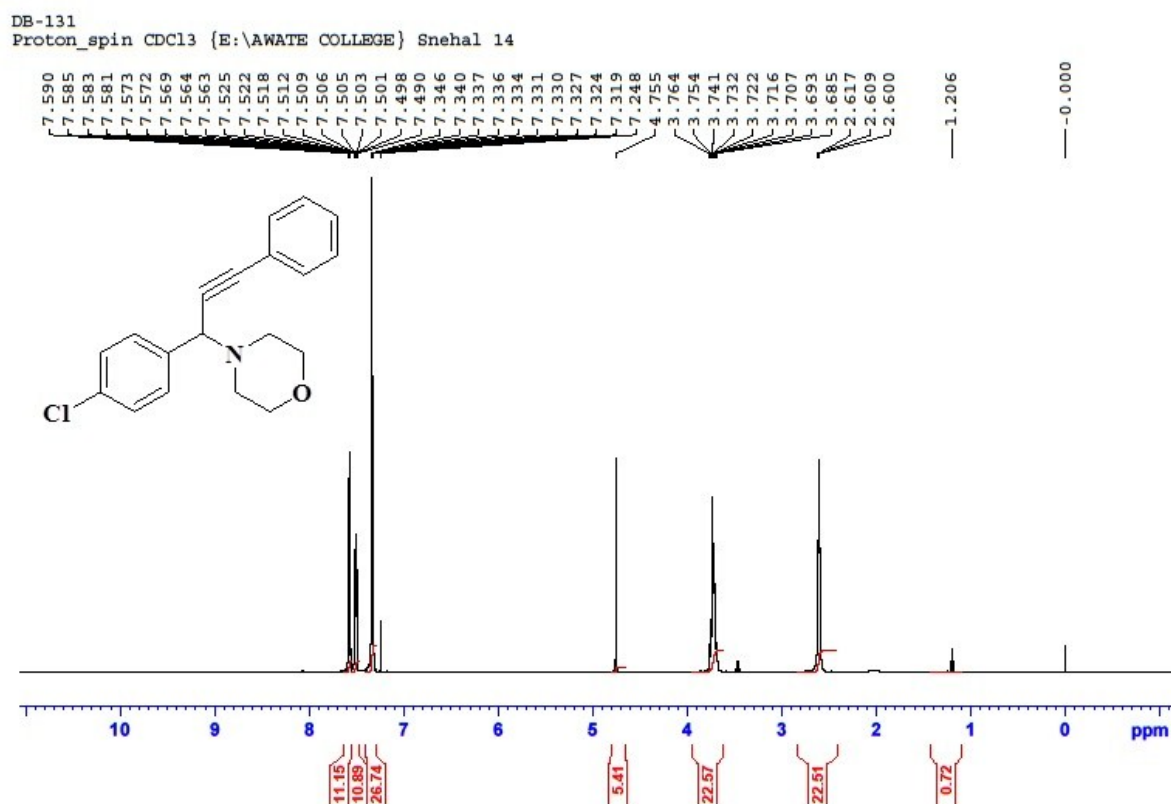

# <sup>13</sup>C NMR (Table 3, Entry 11)

DB-131

C13CPD CDC13 {E:\AWATE COLLEGE} Snehal 13

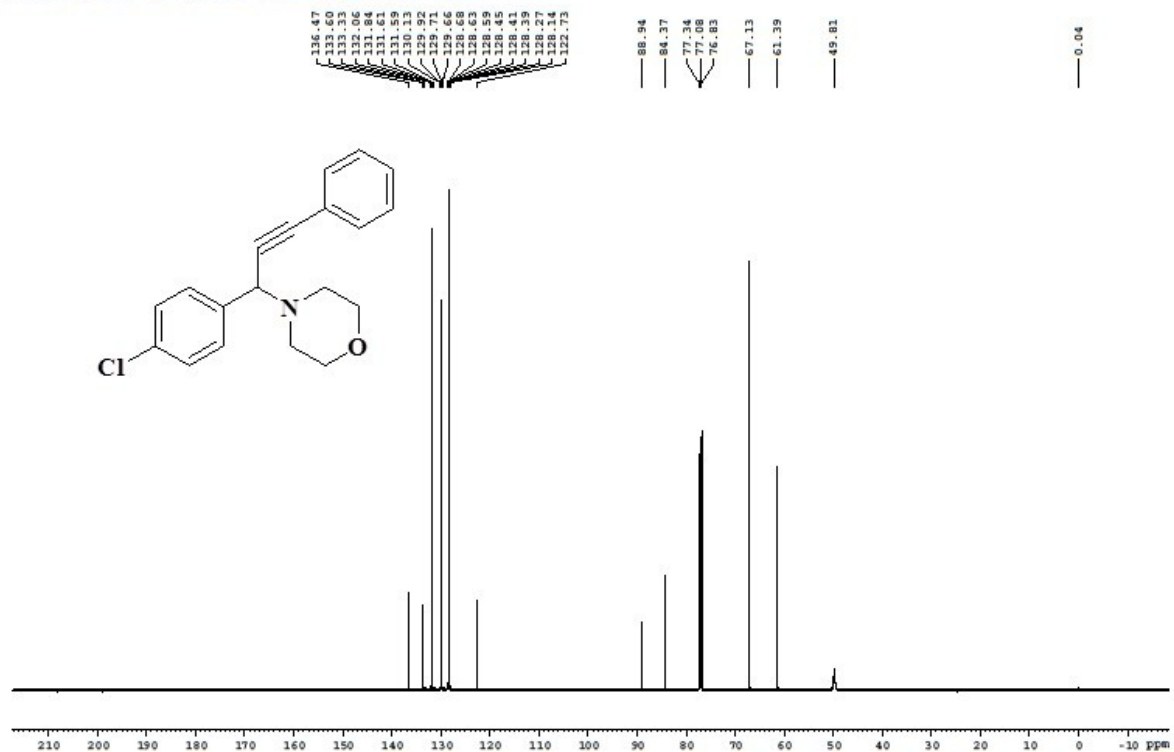

# HRMS (Table 3, Entry 11)

## Savitribai Phule Pune University - Central Instrumentation Facility

|                      |                                                                           |                  |                      |               |
|----------------------|---------------------------------------------------------------------------|------------------|----------------------|---------------|
| <b>Analysis Info</b> |                                                                           | Acquisition Date | 10/7/2017 3:06:01 PM |               |
| Analysis Name        | D:\Data\2017\SEPTEMBER\SPPU AFFILIATED\MANASAHEB AWATE COLLEGE MANCHARK G |                  |                      |               |
|                      | KANADE\BANKAR D B\DB-131_BE8_01_4443.d                                    |                  |                      |               |
| Method               | dlo-ms600mz_10min.m                                                       | Operator         | CIF                  |               |
| Sample Name          | DB-131                                                                    | Instrument       | impact HD            | 1819696.00184 |
| Comment              |                                                                           |                  |                      |               |

|                              |         |                      |          |                  |           |
|------------------------------|---------|----------------------|----------|------------------|-----------|
| <b>Acquisition Parameter</b> |         |                      |          |                  |           |
| Source Type                  | ESI     | Ion Polarity         | Positive | Set Nebulzer     | 0.3 Bar   |
| Focus                        | Active  | Set Capillary        | 3500 V   | Set Dry Heater   | 200 °C    |
| Scan Begin                   | 50 m/z  | Set End Plate Offset | -500 V   | Set Dry Gas      | 4.0 l/min |
| Scan End                     | 600 m/z | Set Charging Voltage | 2000 V   | Set Divert Valve | Waste     |
|                              |         | Set Corona           | 0 nA     | Set APCI Heater  | 0 °C      |

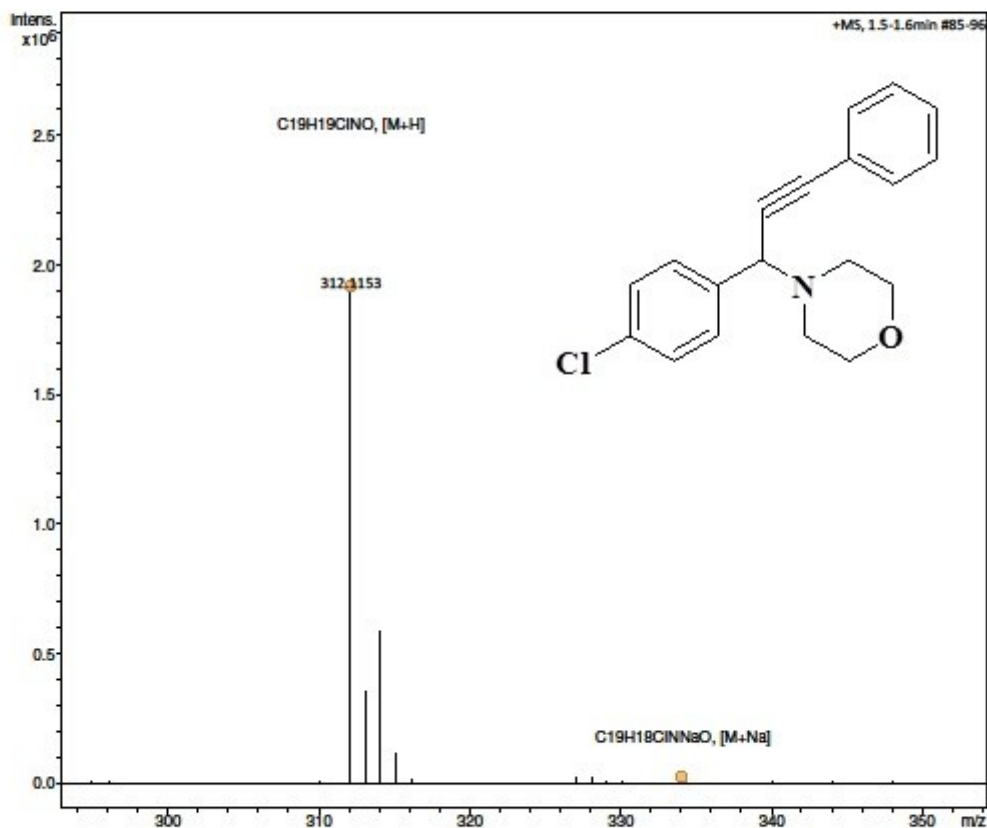

| Meas. m/z | # | Ion Formula  | m/z      | err [ppm] | mSigma | # mSigma | Score  | rdb  | e <sup>-</sup> | Conf | N-Rule | Adduct |
|-----------|---|--------------|----------|-----------|--------|----------|--------|------|----------------|------|--------|--------|
| 312.1153  | 1 | C19H19ClNO   | 312.1150 | -1.1      | 20.7   | 1        | 100.00 | 10.5 | even           |      | ok     | M+H    |
| 334.0973  | 1 | C19H18ClNNaO | 334.0969 | -1.1      | 188.1  | 1        | 100.00 | 10.5 | even           |      | ok     | M+Na   |

DB-131\_BE8\_01\_4443.d

Bruker Compass DataAnalysis 4.2

printed: 10/7/2017 3:24:19 PM

by: CIF

Page 1 of 1

# <sup>1</sup>H NMR (Table 3, Entry 12)

DB-129

Proton\_spin CDCl3 {E:\AWATE COLLEGE} Snehal 12

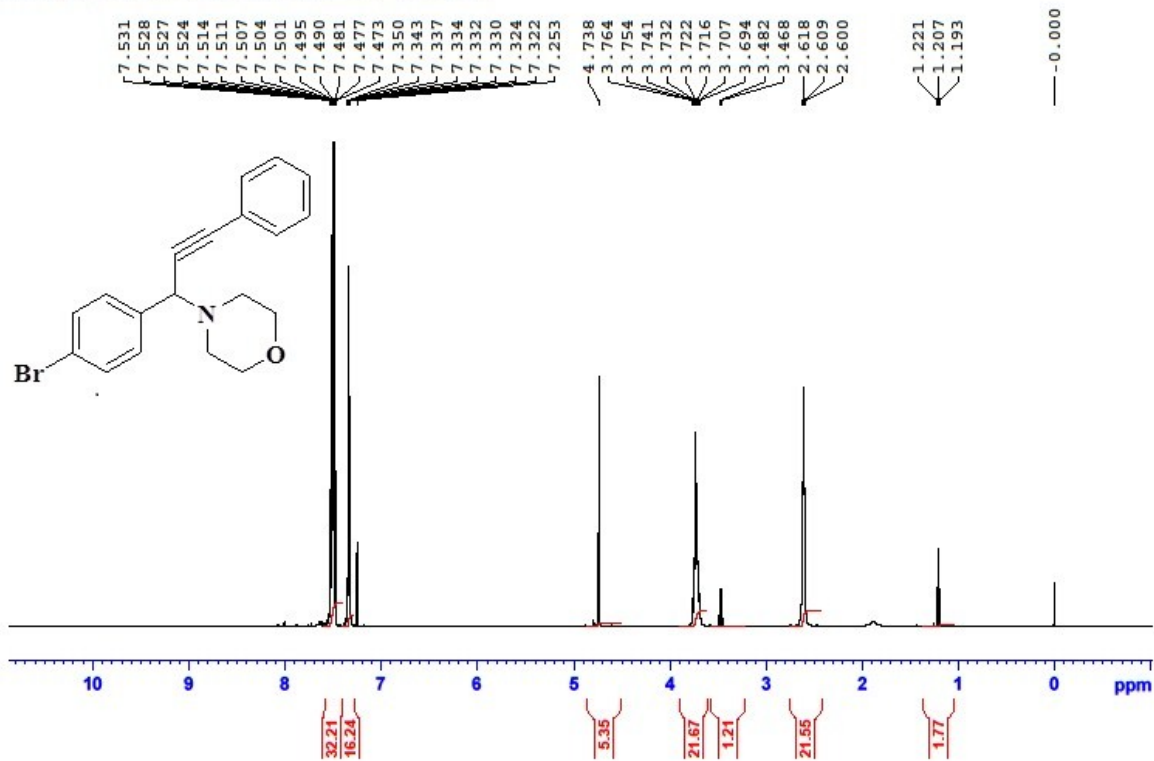

# <sup>13</sup>C NMR (Table 3, Entry 12)

DB-129

C13CPD CDC13 {E:\AWATE COLLEGE} Snehal 11

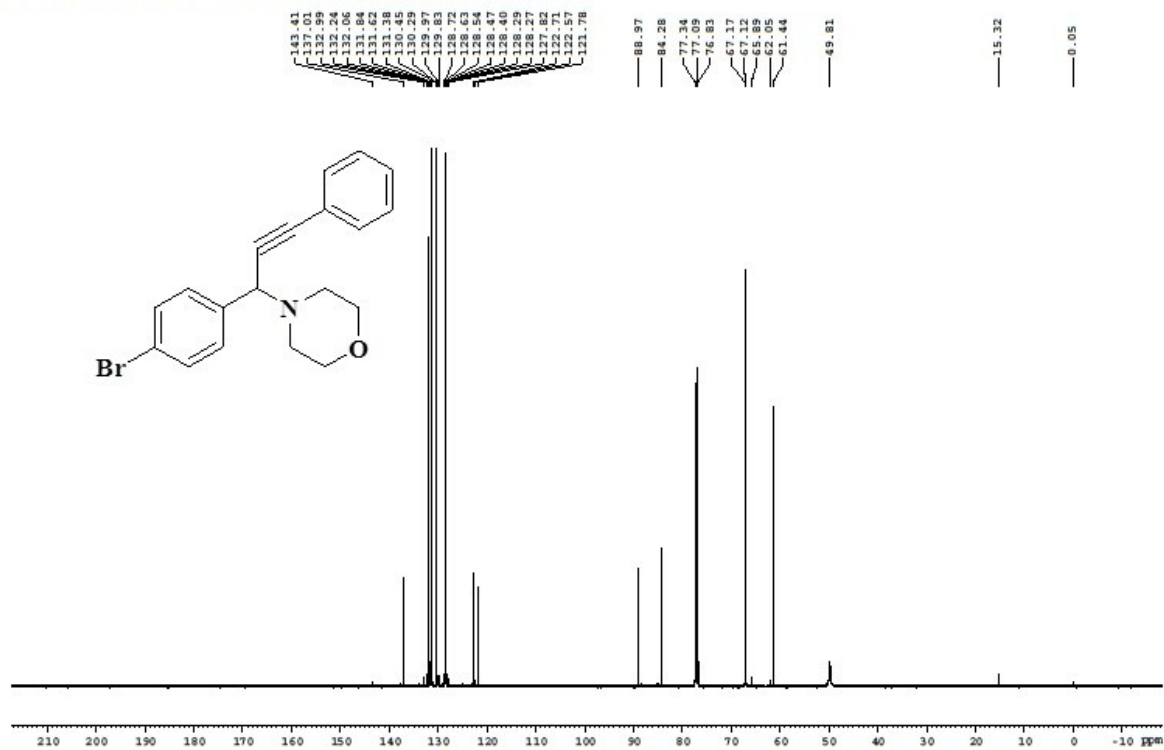

## HRMS (Table 3, Entry 12)

### Savitribai Phule Pune University - Central Instrumentation Facility

|                      |                                                                                                                   |                                    |
|----------------------|-------------------------------------------------------------------------------------------------------------------|------------------------------------|
| <b>Analysis Info</b> | Acquisition Date 10/7/2017 2:37:19 PM                                                                             |                                    |
| Analysis Name        | D:\Data\2017\SEPTEMBER\SPPU AFFILIATED\ANNASAHEB AWATE COLLEGE MANCHAR\K G KANADE\BANKAR D B\DB-129_BE6_01_4441.d |                                    |
| Method               | dlc-ms600mz_10min.m                                                                                               | Operator CIF                       |
| Sample Name          | DB-129                                                                                                            | Instrument impact HD 1819696.00184 |
| Comment              |                                                                                                                   |                                    |

|                              |         |                      |          |                  |           |
|------------------------------|---------|----------------------|----------|------------------|-----------|
| <b>Acquisition Parameter</b> |         |                      |          |                  |           |
| Source Type                  | ESI     | Ion Polarity         | Positive | Set Nebulizer    | 0.3 Bar   |
| Focus                        | Active  | Set Capillary        | 3500 V   | Set Dry Heater   | 200 °C    |
| Scan Begin                   | 50 m/z  | Set End Plate Offset | -500 V   | Set Dry Gas      | 4.0 l/min |
| Scan End                     | 600 m/z | Set Charging Voltage | 2000 V   | Set Divert Valve | Waste     |
|                              |         | Set Corona           | 0 nA     | Set APCI Heater  | 0 °C      |

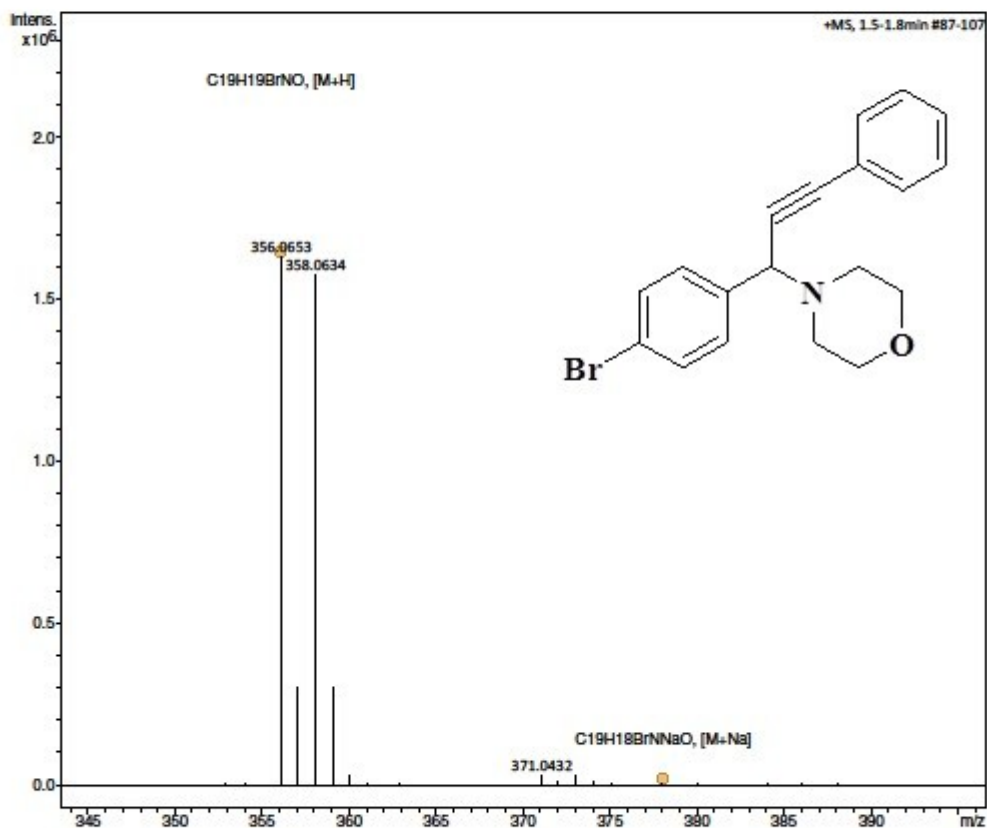

| Meas. m/z | # | Ion Formula                            | m/z      | err [ppm] | mSigma | # mSigma | Score  | rdb  | e <sup>-</sup> | Conf | N-Rule | Adduct |
|-----------|---|----------------------------------------|----------|-----------|--------|----------|--------|------|----------------|------|--------|--------|
| 356.0653  | 1 | C <sub>19</sub> H <sub>19</sub> BrNO   | 356.0645 | -2.3      | 20.8   | 1        | 100.00 | 10.5 | even           |      | ok     | M+H    |
| 378.0470  | 1 | C <sub>19</sub> H <sub>18</sub> BrNNaO | 378.0464 | -1.5      | 54.0   | 1        | 100.00 | 10.5 | even           |      | ok     | M+Na   |

DB-129 BE6\_01\_4441.d

Bruker Compass DataAnalysis 4.2

printed: 10/7/2017 3:00:30 PM

by: CIF

Page 1 of 1
